# Supplementary material for: Inequalities in cancer mortality trends in people with type 2 diabetes: 20 year population-based study in England
Source: PubMed Central journal article supplement (PMC9947024; doi:10.1007/s00125-022-05854-8), 2023-01-24
Supplement: 125_2022_5854_MOESM1_ESM.pdf [file 125_2022_5854_MOESM1_ESM.pdf]

# Electronic Supplementary Material

## Inequalities in cancer mortality trends in people with type 2 diabetes: 20-year population-based study in England

Suping Ling, Francesco Zaccardi, Eyad Issa, Melanie Davies, Kamlesh Khunti, Karen Brown

### Contents

|                                                                                                                                                                  |    |
|------------------------------------------------------------------------------------------------------------------------------------------------------------------|----|
| <b>Additional results: All-cause mortality rates</b> .....                                                                                                       | 2  |
| <b>ESM Table 1.</b> Trends in all-cause and all cancer mortality rates and proportions of cancer death by age.....                                               | 3  |
| <b>ESM Table 2.</b> Trends in all-cause and all cancer mortality rate and proportions of cancer death by gender.....                                             | 4  |
| <b>ESM Table 3.</b> Trends in all-cause and all cancer mortality rate and proportions of cancer death by ethnicity.....                                          | 5  |
| <b>ESM Table 4.</b> Trends in all-cause and all cancer mortality rate and proportions of cancer death by socio-economic status....                               | 6  |
| <b>ESM Table 5.</b> Trends in all-cause and all cancer mortality rate and proportions of cancer death by body mass index.....                                    | 7  |
| <b>ESM Table 6.</b> Trends in all-cause and all cancer mortality rate and proportions of cancer death by smoking status.....                                     | 8  |
| <b>ESM Table 7.</b> Annual percentage change and average annual percentage change in cancer-specific mortality rates (four most common cancers).....             | 9  |
| <b>ESM Table 8.</b> Annual percentage change and average annual percentage change in cancer-specific mortality rates (four type 2 diabetes-related cancers)..... | 11 |
| <b>ESM Figure 1.</b> Study participants selection flowchart.....                                                                                                 | 13 |
| <b>RECORD checklist</b> .....                                                                                                                                    | 14 |

## **Additional results: All-cause mortality rates**

**Figure 1** shows all-cause mortality rates and corresponding 95% confidence intervals (CIs) from 1998 to 2018 by age (**Figure 1a**), gender (**Figure 1b**), ethnicity (**Figure 1c**), socioeconomic status (**Figure 1d**), BMI groups (**Figure 1e**), and smoking status (**Figure 1f**) with corresponding values in **ESM Tables 1-6**; APCs and AAPCs are presented in **Table 3**.

Overall, mortality rates in individuals with type 2 diabetes declined, with a small increase from 1998 to 2008 but a reduction thereafter, at all ages (**Figure 1**; **ESM Table 1**). For 55-year-old individuals, the mortality rate was 6.5 (95% CI: 5.3, 8.1) per 1000 person-years in 1998, 8.5 (7.9, 9.1) in 2008, and 5.0 (4.3, 5.9) in 2018; the resulting AAPC for the whole study period was -1.1% (-1.4, -0.8), indicating an annual 1.1% reduction from 1998 to 2018 (i.e., 22% reduction in the whole period of 20 years). Corresponding AAPCs for 65-, 75-, and 85-year-old were -1.2% (-1.4, -1.0), -1.8% (-2.1, -1.6), and -1.5% (-1.6, -1.4), respectively (**Table 3**).

Similar trends were observed in men and women. Although all-cause mortality rates were higher in men throughout the study period, there was a greater annual reduction in men [AAPC: -1.9% (95% CI: -2.1, -1.7)] than women [-1.1% (-1.3, -0.9)], leading to a narrowed gap by gender in more recent years (**Figure 1b**; **Table 3**; **ESM Table 2**).

Trends among people of White ethnicity were slightly different to other ethnicities, with an overall increase in White (0.6%; 0.5, 0.8) but a reduction in other ethnicities (-3.3%; -3.5, -3.1) over the entire study period (**Figure 1c**; **Table 3**; **ESM Table 3**).

When stratified by IMD quintiles, rates in the most deprived group were always higher than in least deprived. Reductions in all-cause mortality rates were higher in the least deprived (-1.3%; -1.8, -0.7) than in the most deprived (-0.6%; -0.9, -0.3), resulting in wider socioeconomic inequalities (**Figure 1d**; **Table 3**; **ESM Table 4**).

All-cause mortality rates or its trends were not differentiated across BMI groups, with reductions observed in all groups, yet such reduction was smallest in people who were severely obese (-0.6%; -0.7, -0.4) compared to other groups (**Figure 1e**; **Table 3**; **ESM Table 5**).

Rates were markedly higher in current than former or non-smokers, and gaps were wider in recent years, with an increase in the rates in current smoker (0.3%; 0.2, 0.5) and a reduction in former (-1.9%; -2.0, -1.8) or non-smoker (-2.6%; -2.8, -2.4) (**Figure 1f**; **Table 3**; **ESM Table 6**).

**ESM Table 1.** Trends in all-cause and all cancer mortality rates and proportions of cancer death by age

| Period | 55-year-old    |                |                   | 65-year-old       |                |                   |
|--------|----------------|----------------|-------------------|-------------------|----------------|-------------------|
|        | All-cause      | All cancer     | Proportion        | All-cause         | All cancer     | Proportion        |
| 1998   | 6.5 (5.3, 8.1) | 2.1 (1.5, 3.1) | 32.7 (23.7, 41.7) | 16.2 (14.3, 18.2) | 5.2 (4.2, 6.4) | 32.0 (26.8, 38.0) |
| 1999   | 6.7 (5.5, 8.1) | 2.2 (1.6, 3.0) | 32.1 (24.2, 40.1) | 16.4 (14.7, 18.2) | 5.3 (4.4, 6.4) | 32.3 (27.5, 37.7) |
| 2000   | 6.9 (5.8, 8.2) | 2.2 (1.7, 2.9) | 31.6 (24.7, 38.6) | 16.6 (15.2, 18.3) | 5.4 (4.6, 6.4) | 32.7 (28.3, 37.4) |
| 2001   | 7.1 (6.1, 8.2) | 2.2 (1.7, 2.8) | 31.1 (25.2, 37.0) | 16.9 (15.6, 18.3) | 5.6 (4.8, 6.5) | 33.0 (29.1, 37.0) |
| 2002   | 7.3 (6.4, 8.2) | 2.2 (1.8, 2.7) | 30.6 (25.7, 35.6) | 17.1 (16.0, 18.3) | 5.7 (5.0, 6.5) | 33.3 (29.8, 36.6) |
| 2003   | 7.5 (6.8, 8.3) | 2.3 (1.9, 2.7) | 30.2 (25.9, 34.3) | 17.4 (16.4, 18.4) | 5.9 (5.3, 6.5) | 33.7 (30.6, 36.5) |
| 2004   | 7.7 (7.1, 8.4) | 2.3 (2.0, 2.6) | 29.7 (26.1, 33.3) | 17.6 (16.8, 18.5) | 6.0 (5.5, 6.6) | 34.0 (31.3, 36.5) |
| 2005   | 7.9 (7.4, 8.5) | 2.3 (2.0, 2.6) | 29.2 (26.2, 32.2) | 17.9 (17.1, 18.7) | 6.2 (5.7, 6.7) | 34.4 (32.0, 36.7) |
| 2006   | 8.1 (7.6, 8.7) | 2.3 (2.1, 2.6) | 28.8 (25.8, 31.6) | 18.1 (17.4, 18.9) | 6.3 (5.8, 6.8) | 34.8 (32.6, 37.1) |
| 2007   | 8.3 (7.8, 8.9) | 2.4 (2.1, 2.7) | 28.4 (25.3, 31.4) | 18.4 (17.6, 19.1) | 6.5 (6.0, 7.0) | 35.2 (33.0, 37.7) |
| 2008   | 8.5 (7.9, 9.1) | 2.4 (2.1, 2.7) | 28.3 (25.1, 31.4) | 18.4 (17.6, 19.2) | 6.6 (6.0, 7.1) | 35.7 (33.4, 38.4) |
| 2009   | 8.5 (7.9, 9.1) | 2.4 (2.1, 2.8) | 28.7 (25.8, 31.8) | 18.1 (17.4, 18.9) | 6.6 (6.1, 7.1) | 36.4 (34.1, 39.1) |
| 2010   | 8.3 (7.8, 8.8) | 2.5 (2.2, 2.8) | 29.8 (27.2, 32.8) | 17.4 (16.7, 18.0) | 6.5 (6.1, 7.0) | 37.4 (35.3, 39.8) |
| 2011   | 7.9 (7.4, 8.5) | 2.5 (2.2, 2.8) | 31.5 (28.6, 34.7) | 16.4 (15.8, 17.0) | 6.3 (5.9, 6.8) | 38.6 (36.3, 41.0) |
| 2012   | 7.6 (7.0, 8.2) | 2.5 (2.2, 2.9) | 33.1 (29.4, 37.1) | 15.6 (14.9, 16.3) | 6.1 (5.6, 6.7) | 39.3 (36.5, 42.1) |
| 2013   | 7.4 (6.9, 8.0) | 2.5 (2.2, 2.8) | 33.8 (30.4, 37.3) | 15.4 (14.7, 16.0) | 5.9 (5.5, 6.4) | 38.7 (36.3, 41.4) |
| 2014   | 7.3 (6.8, 7.8) | 2.4 (2.1, 2.7) | 33.2 (30.1, 36.7) | 15.7 (15.1, 16.3) | 5.8 (5.4, 6.3) | 37.1 (34.8, 39.5) |
| 2015   | 7.1 (6.5, 7.7) | 2.3 (2.0, 2.6) | 32.3 (28.4, 36.0) | 15.8 (15.1, 16.5) | 5.7 (5.2, 6.2) | 35.9 (33.5, 38.8) |
| 2016   | 6.5 (6.0, 7.0) | 2.1 (1.8, 2.4) | 31.7 (28.2, 35.0) | 15.0 (14.4, 15.6) | 5.4 (5.0, 5.9) | 36.4 (34.1, 38.8) |
| 2017   | 5.8 (5.3, 6.3) | 1.8 (1.5, 2.1) | 31.6 (27.8, 35.6) | 13.6 (13.0, 14.2) | 5.2 (4.8, 5.6) | 38.1 (35.5, 41.1) |
| 2018   | 5.0 (4.3, 5.9) | 1.6 (1.2, 2.1) | 31.7 (25.5, 38.4) | 12.2 (11.3, 13.1) | 4.9 (4.3, 5.7) | 40.4 (36.2, 45.2) |

  

| Period | 75-year-old       |                   |                   | 85-year-old          |                   |                   |
|--------|-------------------|-------------------|-------------------|----------------------|-------------------|-------------------|
|        | All-cause         | All cancer        | Proportion        | All-cause            | All cancer        | Proportion        |
| 1998   | 41.6 (37.2, 46.4) | 8.8 (7.0, 11.1)   | 21.2 (17.4, 25.5) | 114.8 (101.0, 130.5) | 14.7 (11.2, 19.4) | 12.8 (10.0, 16.2) |
| 1999   | 41.7 (37.8, 46.0) | 9.3 (7.6, 11.5)   | 22.3 (18.7, 26.4) | 114.8 (102.4, 128.7) | 15.4 (12.0, 19.7) | 13.4 (10.8, 16.6) |
| 2000   | 41.9 (38.4, 45.7) | 9.9 (8.2, 11.8)   | 23.5 (20.0, 27.2) | 114.8 (103.9, 126.9) | 16.1 (13.0, 20.0) | 14.0 (11.5, 17.0) |
| 2001   | 42.1 (39.0, 45.3) | 10.4 (8.9, 12.2)  | 24.8 (21.4, 28.2) | 114.8 (105.3, 125.3) | 16.8 (13.9, 20.3) | 14.6 (12.4, 17.3) |
| 2002   | 42.2 (39.6, 45.0) | 11.0 (9.6, 12.6)  | 26.1 (23.0, 29.1) | 114.8 (106.6, 123.7) | 17.6 (15.0, 20.6) | 15.3 (13.3, 17.7) |
| 2003   | 42.4 (40.1, 44.7) | 11.6 (10.4, 13.0) | 27.5 (24.7, 30.1) | 114.9 (107.9, 122.3) | 18.4 (16.1, 21.0) | 16.0 (14.1, 18.0) |
| 2004   | 42.5 (40.6, 44.5) | 12.3 (11.2, 13.5) | 28.9 (26.4, 31.3) | 114.9 (109.0, 121.0) | 19.2 (17.2, 21.4) | 16.7 (15.0, 18.4) |
| 2005   | 42.7 (41.0, 44.4) | 13.0 (12.0, 14.1) | 30.4 (28.2, 32.6) | 114.9 (109.9, 120.1) | 20.0 (18.3, 22.0) | 17.4 (15.9, 18.8) |
| 2006   | 42.9 (41.3, 44.5) | 13.7 (12.7, 14.8) | 32.1 (29.8, 34.2) | 114.9 (110.4, 119.6) | 20.9 (19.2, 22.8) | 18.2 (16.7, 19.5) |
| 2007   | 42.9 (41.3, 44.6) | 14.5 (13.4, 15.6) | 33.7 (31.6, 35.8) | 114.7 (110.1, 119.5) | 21.8 (20.0, 23.8) | 19.0 (17.5, 20.6) |
| 2008   | 42.4 (40.7, 44.2) | 14.9 (13.7, 16.2) | 35.2 (32.9, 37.4) | 113.8 (109.1, 118.7) | 22.5 (20.6, 24.7) | 19.8 (18.2, 21.5) |
| 2009   | 41.1 (39.6, 42.8) | 14.9 (13.8, 16.1) | 36.2 (33.8, 38.5) | 111.7 (107.2, 116.4) | 22.9 (21.0, 25.0) | 20.5 (18.8, 22.3) |
| 2010   | 38.8 (37.5, 40.2) | 14.2 (13.2, 15.2) | 36.5 (34.3, 38.5) | 108.0 (104.3, 112.0) | 22.8 (21.1, 24.6) | 21.1 (19.5, 22.7) |
| 2011   | 35.9 (34.7, 37.2) | 13.0 (12.1, 14.0) | 36.3 (34.0, 38.6) | 103.6 (100.0, 107.3) | 22.4 (20.7, 24.2) | 21.6 (20.0, 23.2) |
| 2012   | 33.8 (32.4, 35.3) | 12.2 (11.2, 13.3) | 36.0 (33.6, 38.8) | 100.6 (96.5, 104.8)  | 22.2 (20.3, 24.2) | 22.0 (20.4, 23.9) |
| 2013   | 33.6 (32.3, 34.9) | 12.1 (11.2, 13.0) | 35.9 (33.6, 38.5) | 101.2 (97.5, 105.2)  | 22.7 (21.0, 24.6) | 22.4 (20.9, 24.1) |
| 2014   | 35.1 (33.8, 36.3) | 12.5 (11.7, 13.5) | 35.8 (33.6, 38.5) | 105.0 (101.6, 108.6) | 23.8 (22.1, 25.6) | 22.6 (21.2, 24.2) |
| 2015   | 36.2 (34.7, 37.7) | 13.0 (11.9, 14.1) | 35.8 (33.4, 38.7) | 106.8 (102.7, 111.0) | 24.2 (22.3, 26.4) | 22.7 (21.1, 24.5) |
| 2016   | 34.9 (33.6, 36.3) | 12.7 (11.8, 13.7) | 36.4 (34.2, 38.9) | 101.8 (98.2, 105.6)  | 23.3 (21.6, 25.2) | 22.9 (21.4, 24.5) |
| 2017   | 31.9 (30.6, 33.3) | 12.0 (11.1, 13.1) | 37.7 (35.0, 40.6) | 92.5 (89.0, 96.1)    | 21.6 (19.9, 23.5) | 23.4 (21.7, 25.1) |
| 2018   | 28.8 (26.9, 30.8) | 11.3 (9.9, 12.9)  | 39.2 (34.6, 43.8) | 82.8 (77.9, 88.1)    | 19.8 (17.3, 22.6) | 23.9 (21.2, 26.8) |

Proportion (%) and 95% confidence interval of cancer death out of all-cause death.

Rates and 95% confidence interval are presented per 1000 person-years.

**ESM Table 2.** Trends in all-cause and all cancer mortality rate and proportions of cancer death by gender

| Period | Men               |                   |                   | Women             |                  |                   |
|--------|-------------------|-------------------|-------------------|-------------------|------------------|-------------------|
|        | All-cause         | All cancer        | Proportion        | All-cause         | All cancer       | Proportion        |
| 1998   | 36.0 (30.6, 42.5) | 10.5 (8.1, 13.5)  | 29.0 (24.1, 35.4) | 25.4 (21.0, 30.6) | 5.4 (3.9, 7.6)   | 21.5 (15.8, 27.5) |
| 1999   | 36.1 (31.1, 41.7) | 10.8 (8.6, 13.6)  | 30.0 (25.4, 35.7) | 25.7 (21.7, 30.4) | 5.8 (4.3, 7.9)   | 22.6 (17.2, 28.3) |
| 2000   | 36.1 (31.7, 41.0) | 11.2 (9.2, 13.6)  | 31.0 (26.7, 36.2) | 26.0 (22.5, 30.1) | 6.2 (4.7, 8.1)   | 23.8 (18.7, 28.9) |
| 2001   | 36.1 (32.3, 40.4) | 11.5 (9.7, 13.7)  | 32.0 (28.0, 36.5) | 26.3 (23.2, 29.9) | 6.6 (5.2, 8.3)   | 25.1 (20.2, 29.7) |
| 2002   | 36.1 (32.8, 39.7) | 11.9 (10.3, 13.8) | 33.0 (29.4, 37.0) | 26.7 (23.9, 29.7) | 7.0 (5.8, 8.6)   | 26.4 (22.1, 30.5) |
| 2003   | 36.1 (33.3, 39.1) | 12.3 (10.8, 14.0) | 34.1 (30.8, 37.8) | 27.0 (24.7, 29.6) | 7.5 (6.4, 8.9)   | 27.8 (23.7, 31.4) |
| 2004   | 36.1 (33.7, 38.7) | 12.7 (11.4, 14.2) | 35.2 (32.4, 38.4) | 27.3 (25.3, 29.5) | 8.0 (7.0, 9.2)   | 29.3 (25.6, 32.5) |
| 2005   | 36.1 (34.1, 38.3) | 13.1 (12.0, 14.5) | 36.4 (33.6, 39.2) | 27.7 (25.9, 29.6) | 8.5 (7.6, 9.7)   | 30.9 (27.6, 33.8) |
| 2006   | 36.1 (34.2, 38.2) | 13.6 (12.4, 14.9) | 37.6 (34.8, 40.4) | 28.0 (26.3, 29.8) | 9.1 (8.1, 10.2)  | 32.5 (29.4, 35.6) |
| 2007   | 36.1 (34.1, 38.2) | 14.0 (12.7, 15.3) | 38.8 (35.7, 41.7) | 28.3 (26.5, 30.2) | 9.7 (8.6, 10.9)  | 34.3 (30.9, 37.9) |
| 2008   | 35.6 (33.5, 37.8) | 14.2 (12.8, 15.6) | 39.8 (36.6, 42.9) | 28.1 (26.3, 30.1) | 10.1 (9.0, 11.5) | 36.0 (32.4, 40.0) |
| 2009   | 34.5 (32.5, 36.6) | 13.9 (12.7, 15.3) | 40.4 (37.4, 43.5) | 27.4 (25.7, 29.3) | 10.4 (9.2, 11.6) | 37.8 (34.2, 41.5) |
| 2010   | 32.5 (30.9, 34.3) | 13.2 (12.1, 14.3) | 40.5 (37.9, 43.3) | 25.9 (24.5, 27.5) | 10.2 (9.2, 11.3) | 39.4 (36.0, 42.8) |
| 2011   | 30.0 (28.5, 31.7) | 12.1 (11.1, 13.2) | 40.3 (37.7, 43.3) | 24.1 (22.7, 25.7) | 9.8 (8.8, 11.0)  | 40.6 (36.7, 44.5) |
| 2012   | 28.1 (26.4, 29.9) | 11.2 (10.1, 12.4) | 39.9 (37.1, 43.2) | 22.9 (21.2, 24.6) | 9.4 (8.3, 10.7)  | 41.2 (36.6, 45.3) |
| 2013   | 27.7 (26.1, 29.4) | 10.8 (9.9, 11.9)  | 39.2 (36.5, 42.1) | 22.9 (21.5, 24.5) | 9.3 (8.3, 10.4)  | 40.4 (36.5, 44.1) |
| 2014   | 28.8 (27.3, 30.3) | 11.0 (10.1, 12.0) | 38.3 (36.0, 41.1) | 24.1 (22.7, 25.6) | 9.2 (8.3, 10.3)  | 38.4 (34.9, 42.2) |
| 2015   | 29.8 (28.0, 31.7) | 11.4 (10.3, 12.5) | 38.1 (35.4, 41.0) | 24.9 (23.2, 26.7) | 9.0 (7.9, 10.3)  | 36.3 (32.4, 40.4) |
| 2016   | 29.0 (27.4, 30.7) | 11.5 (10.5, 12.6) | 39.5 (37.1, 42.2) | 24.0 (22.5, 25.5) | 8.5 (7.6, 9.5)   | 35.5 (32.1, 39.0) |
| 2017   | 26.8 (25.3, 28.5) | 11.4 (10.3, 12.5) | 42.4 (39.5, 45.8) | 21.9 (20.4, 23.5) | 7.8 (6.8, 8.9)   | 35.7 (31.4, 39.9) |
| 2018   | 24.4 (22.1, 27.0) | 11.3 (9.6, 13.1)  | 46.0 (41.0, 51.5) | 19.8 (17.6, 22.2) | 7.2 (5.8, 8.8)   | 36.2 (29.9, 42.2) |

Proportion (%) and 95% confidence interval of cancer death out of all-cause death.

Rates and 95% confidence interval are presented per 1000 person-years.

**ESM Table 3.** Trends in all-cause and all cancer mortality rate and proportions of cancer death by ethnicity

| Period | White             |                   |                   | Others            |                  |            |
|--------|-------------------|-------------------|-------------------|-------------------|------------------|------------|
|        | All-cause         | All cancer        | Proportion        | All-cause         | All cancer       | Proportion |
| 1998   | 22.2 (19.2, 25.5) | 6.6 (5.3, 8.2)    | 29.6 (25.1, 34.1) | 19.0 (9.5, 37.9)  | 12.3 (3.4, 44.3) | -          |
| 1999   | 23.0 (20.2, 26.1) | 7.0 (5.8, 8.5)    | 30.5 (26.4, 34.5) | 18.9 (10.2, 35.1) | 11.5 (3.6, 36.1) | -          |
| 2000   | 23.8 (21.3, 26.7) | 7.5 (6.3, 8.9)    | 31.5 (27.6, 35.1) | 18.8 (10.8, 32.6) | 10.7 (3.8, 29.6) | -          |
| 2001   | 24.7 (22.4, 27.3) | 8.0 (6.9, 9.3)    | 32.4 (28.9, 35.8) | 18.7 (11.5, 30.3) | 9.9 (4.0, 24.3)  | -          |
| 2002   | 25.6 (23.6, 27.9) | 8.6 (7.5, 9.8)    | 33.4 (30.3, 36.4) | 18.5 (12.2, 28.3) | 9.2 (4.2, 20.0)  | -          |
| 2003   | 26.6 (24.8, 28.5) | 9.2 (8.2, 10.2)   | 34.4 (31.6, 37.1) | 18.4 (12.8, 26.4) | 8.6 (4.4, 16.7)  | -          |
| 2004   | 27.6 (26.0, 29.3) | 9.8 (8.9, 10.7)   | 35.5 (32.9, 37.9) | 18.3 (13.5, 24.8) | 7.9 (4.5, 14.1)  | -          |
| 2005   | 28.6 (27.2, 30.1) | 10.5 (9.6, 11.3)  | 36.6 (34.1, 38.8) | 18.2 (14.1, 23.5) | 7.4 (4.5, 12.1)  | -          |
| 2006   | 29.7 (28.4, 31.0) | 11.2 (10.4, 12.0) | 37.7 (35.2, 39.9) | 18.1 (14.5, 22.6) | 6.9 (4.4, 10.8)  | -          |
| 2007   | 30.7 (29.4, 32.1) | 11.9 (11.1, 12.9) | 38.8 (36.3, 41.2) | 18.0 (14.6, 22.1) | 6.4 (4.1, 10.0)  | -          |
| 2008   | 31.6 (30.1, 33.2) | 12.6 (11.6, 13.6) | 39.8 (37.1, 42.4) | 17.7 (14.3, 22.0) | 5.9 (3.7, 9.5)   | -          |
| 2009   | 32.0 (30.5, 33.5) | 12.9 (12.0, 14.0) | 40.4 (38.0, 43.2) | 17.3 (13.8, 21.6) | 5.6 (3.4, 9.2)   | -          |
| 2010   | 31.4 (30.1, 32.8) | 12.8 (11.9, 13.7) | 40.6 (38.5, 42.9) | 16.3 (13.2, 20.3) | 5.3 (3.3, 8.5)   | -          |
| 2011   | 30.0 (28.8, 31.2) | 12.1 (11.3, 13.0) | 40.4 (38.2, 42.9) | 14.9 (12.3, 18.0) | 5.1 (3.3, 7.8)   | -          |
| 2012   | 28.5 (27.1, 30.0) | 11.4 (10.6, 12.4) | 40.2 (37.6, 43.1) | 13.3 (10.8, 16.3) | 5.0 (3.2, 7.8)   | -          |
| 2013   | 28.1 (26.8, 29.6) | 11.2 (10.4, 12.1) | 39.7 (37.3, 42.3) | 12.4 (9.8, 15.8)  | 4.9 (2.8, 8.4)   | -          |
| 2014   | 29.3 (28.1, 30.6) | 11.3 (10.6, 12.2) | 38.7 (36.5, 40.9) | 12.9 (10.5, 16.0) | 4.7 (2.8, 7.7)   | -          |
| 2015   | 30.5 (29.0, 32.1) | 11.6 (10.7, 12.6) | 38.0 (35.5, 40.6) | 14.5 (11.7, 17.9) | 4.4 (2.6, 7.4)   | -          |
| 2016   | 29.9 (28.5, 31.4) | 11.5 (10.7, 12.4) | 38.5 (36.2, 41.1) | 14.6 (11.5, 18.5) | 4.5 (2.5, 8.2)   | -          |
| 2017   | 27.8 (26.5, 29.2) | 11.2 (10.4, 12.2) | 40.4 (37.9, 43.0) | 12.2 (9.8, 15.3)  | 5.2 (3.2, 8.5)   | -          |
| 2018   | 25.5 (23.5, 27.7) | 10.9 (9.6, 12.4)  | 42.8 (38.7, 47.2) | 9.5 (6.5, 14.0)   | 6.2 (2.8, 13.9)  | -          |

Proportion (%) and 95% confidence interval of cancer death out of all-cause death.

Rates and 95% confidence interval are presented per 1000 person-years.

As the number of deaths among other ethnicities (South Asian, Black and other ethnic groups) that occurred in some years was very small, the proportions of cancer deaths out of all-cause deaths for other ethnicities were not estimated.

**ESM Table 4.** Trends in all-cause and all cancer mortality rate and proportions of cancer death by socio-economic status

| Period | IMD – 1 <sup>st</sup> quintile (Least deprived) |                   |                   | IMD – 2 <sup>nd</sup> quintile |                  |                   | IMD – 3 <sup>rd</sup> quintile |                  |                   |
|--------|-------------------------------------------------|-------------------|-------------------|--------------------------------|------------------|-------------------|--------------------------------|------------------|-------------------|
|        | All-cause                                       | All cancer        | Proportion        | All-cause                      | All cancer       | Proportion        | All-cause                      | All cancer       | Proportion        |
| 1998   | 21.8 (16.0, 29.7)                               | 5.6 (3.4, 9.2)    | 25.9 (17.8, 36.4) | 29.2 (22.5, 38.0)              | 7.2 (4.7, 11.1)  | 24.8 (17.5, 32.7) | 31.4 (23.6, 41.7)              | 9.4 (6.0, 14.8)  | 29.9 (21.3, 41.4) |
| 1999   | 22.4 (17.0, 29.5)                               | 6.2 (4.0, 9.5)    | 27.5 (19.9, 36.8) | 29.0 (23.0, 36.7)              | 7.6 (5.2, 11.1)  | 26.2 (19.2, 33.3) | 31.4 (24.4, 40.4)              | 9.6 (6.4, 14.3)  | 30.5 (22.4, 40.8) |
| 2000   | 23.1 (18.1, 29.4)                               | 6.7 (4.6, 9.9)    | 29.1 (21.8, 37.7) | 28.9 (23.5, 35.5)              | 8.0 (5.7, 11.1)  | 27.6 (21.0, 34.3) | 31.4 (25.1, 39.2)              | 9.8 (6.8, 13.9)  | 31.1 (24.0, 40.2) |
| 2001   | 23.7 (19.2, 29.3)                               | 7.3 (5.2, 10.2)   | 30.9 (24.2, 38.5) | 28.7 (24.0, 34.3)              | 8.3 (6.2, 11.1)  | 29.1 (23.0, 35.4) | 31.4 (25.9, 38.0)              | 10.0 (7.3, 13.6) | 31.8 (25.1, 39.9) |
| 2002   | 24.4 (20.4, 29.3)                               | 8.0 (6.0, 10.6)   | 32.7 (26.5, 39.8) | 28.5 (24.5, 33.2)              | 8.7 (6.8, 11.2)  | 30.6 (25.2, 36.6) | 31.4 (26.7, 36.9)              | 10.2 (7.8, 13.3) | 32.4 (26.5, 39.3) |
| 2003   | 25.2 (21.6, 29.3)                               | 8.7 (6.9, 11.1)   | 34.7 (28.9, 41.4) | 28.4 (25.0, 32.3)              | 9.2 (7.4, 11.3)  | 32.3 (27.2, 37.7) | 31.4 (27.4, 36.0)              | 10.4 (8.3, 13.0) | 33.1 (27.8, 39.1) |
| 2004   | 25.9 (22.8, 29.4)                               | 9.5 (7.8, 11.7)   | 36.8 (31.5, 43.5) | 28.2 (25.3, 31.4)              | 9.6 (8.0, 11.5)  | 34.0 (29.3, 39.0) | 31.4 (28.0, 35.2)              | 10.6 (8.8, 12.8) | 33.8 (28.8, 39.5) |
| 2005   | 26.7 (23.9, 29.7)                               | 10.4 (8.7, 12.4)  | 39.0 (33.9, 45.3) | 28.1 (25.5, 30.8)              | 10.1 (8.6, 11.8) | 35.9 (31.2, 40.7) | 31.4 (28.4, 34.6)              | 10.8 (9.1, 12.8) | 34.5 (30.1, 39.4) |
| 2006   | 27.4 (24.8, 30.3)                               | 11.3 (9.6, 13.4)  | 41.3 (36.2, 47.5) | 27.9 (25.5, 30.5)              | 10.6 (9.1, 12.3) | 37.8 (32.7, 42.9) | 31.4 (28.5, 34.5)              | 11.0 (9.4, 13.0) | 35.2 (30.6, 39.9) |
| 2007   | 28.1 (25.4, 31.2)                               | 12.2 (10.3, 14.6) | 43.5 (37.9, 49.6) | 27.7 (25.3, 30.4)              | 11.0 (9.4, 12.9) | 39.8 (34.6, 45.2) | 31.2 (28.3, 34.5)              | 11.2 (9.5, 13.3) | 36.0 (31.0, 41.3) |
| 2008   | 28.3 (25.4, 31.6)                               | 12.8 (10.7, 15.3) | 45.1 (39.3, 51.7) | 27.5 (24.9, 30.3)              | 11.4 (9.7, 13.4) | 41.4 (35.9, 47.4) | 30.8 (27.7, 34.1)              | 11.4 (9.5, 13.5) | 36.9 (31.4, 42.5) |
| 2009   | 27.6 (24.8, 30.7)                               | 12.6 (10.6, 14.9) | 45.6 (39.9, 52.1) | 27.2 (24.7, 29.9)              | 11.5 (9.8, 13.5) | 42.3 (36.9, 48.1) | 29.7 (26.9, 32.9)              | 11.3 (9.6, 13.4) | 38.0 (32.9, 43.3) |
| 2010   | 25.6 (23.3, 28.2)                               | 11.5 (9.9, 13.4)  | 44.9 (39.6, 51.0) | 26.7 (24.6, 29.1)              | 11.3 (9.8, 13.0) | 42.2 (37.5, 47.3) | 28.1 (25.7, 30.6)              | 11.1 (9.5, 12.9) | 39.5 (34.8, 44.0) |
| 2011   | 22.8 (20.6, 25.2)                               | 10.0 (8.4, 11.9)  | 44.0 (38.4, 50.4) | 26.2 (24.0, 28.5)              | 10.8 (9.3, 12.4) | 41.2 (36.6, 46.2) | 26.2 (23.9, 28.8)              | 10.7 (9.1, 12.6) | 40.9 (35.9, 45.6) |
| 2012   | 20.6 (18.2, 23.2)                               | 8.9 (7.4, 10.8)   | 43.5 (38.1, 50.6) | 25.5 (23.0, 28.2)              | 10.2 (8.7, 12.0) | 40.0 (34.8, 45.9) | 25.2 (22.6, 28.1)              | 10.5 (8.7, 12.5) | 41.5 (35.6, 47.1) |
| 2013   | 20.0 (17.8, 22.4)                               | 8.7 (7.3, 10.2)   | 43.4 (38.2, 50.0) | 24.7 (22.4, 27.3)              | 9.8 (8.4, 11.4)  | 39.7 (34.9, 44.9) | 26.0 (23.5, 28.7)              | 10.5 (8.9, 12.3) | 40.4 (35.0, 45.3) |
| 2014   | 21.0 (19.0, 23.2)                               | 8.8 (7.4, 10.4)   | 41.9 (36.8, 48.5) | 24.0 (22.0, 26.1)              | 9.7 (8.4, 11.1)  | 40.3 (35.6, 45.4) | 28.2 (25.8, 30.8)              | 10.7 (9.2, 12.5) | 38.1 (33.4, 42.4) |
| 2015   | 22.0 (19.5, 24.7)                               | 8.8 (7.2, 10.6)   | 39.9 (34.6, 46.9) | 23.3 (21.0, 25.9)              | 9.6 (8.1, 11.4)  | 41.3 (36.2, 47.1) | 29.5 (26.5, 32.7)              | 10.9 (9.1, 13.0) | 36.9 (32.0, 42.2) |
| 2016   | 21.2 (19.0, 23.7)                               | 8.3 (7.0, 9.9)    | 39.3 (34.5, 45.1) | 22.9 (20.8, 25.2)              | 9.6 (8.2, 11.2)  | 42.0 (37.3, 47.1) | 27.5 (25.0, 30.2)              | 10.7 (9.1, 12.5) | 38.8 (34.1, 43.9) |
| 2017   | 19.2 (17.1, 21.5)                               | 7.7 (6.3, 9.3)    | 40.1 (34.3, 47.0) | 22.6 (20.5, 24.9)              | 9.6 (8.1, 11.3)  | 42.5 (37.0, 47.4) | 23.6 (21.2, 26.3)              | 10.2 (8.5, 12.2) | 43.2 (37.3, 49.5) |
| 2018   | 17.0 (14.0, 20.5)                               | 7.0 (5.2, 9.6)    | 41.5 (32.2, 52.3) | 22.4 (19.0, 26.3)              | 9.6 (7.3, 12.5)  | 42.8 (33.9, 52.2) | 19.8 (16.6, 23.7)              | 9.7 (7.3, 12.9)  | 49.0 (39.6, 60.7) |

  

| Period | IMD – 4 <sup>th</sup> quintile |                   |                   | IMD – 5 <sup>th</sup> quintile (Most deprived) |                   |                   |
|--------|--------------------------------|-------------------|-------------------|------------------------------------------------|-------------------|-------------------|
|        | All-cause                      | All cancer        | Proportion        | All-cause                                      | All cancer        | Proportion        |
| 1998   | 40.0 (30.3, 52.9)              | 10.1 (6.4, 15.8)  | 25.2 (17.9, 35.2) | 33.6 (25.3, 44.5)                              | 9.8 (6.1, 15.9)   | 29.2 (19.0, 41.8) |
| 1999   | 39.6 (30.9, 50.7)              | 10.4 (6.9, 15.5)  | 26.1 (19.1, 35.3) | 34.6 (26.9, 44.4)                              | 10.1 (6.6, 15.5)  | 29.3 (19.9, 40.1) |
| 2000   | 39.2 (31.5, 48.7)              | 10.6 (7.5, 15.1)  | 27.1 (20.5, 35.4) | 35.6 (28.5, 44.3)                              | 10.4 (7.1, 15.3)  | 29.3 (20.8, 38.7) |
| 2001   | 38.8 (32.1, 46.8)              | 10.9 (8.0, 14.8)  | 28.1 (21.9, 35.5) | 36.6 (30.2, 44.3)                              | 10.7 (7.7, 15.0)  | 29.4 (21.8, 37.3) |
| 2002   | 38.4 (32.7, 45.1)              | 11.2 (8.6, 14.5)  | 29.1 (23.5, 35.7) | 37.7 (32.0, 44.3)                              | 11.1 (8.3, 14.8)  | 29.4 (22.9, 35.8) |
| 2003   | 38.0 (33.2, 43.5)              | 11.5 (9.2, 14.3)  | 30.1 (25.0, 35.8) | 38.8 (33.8, 44.5)                              | 11.4 (8.9, 14.6)  | 29.5 (23.8, 34.7) |
| 2004   | 37.6 (33.6, 42.1)              | 11.7 (9.7, 14.2)  | 31.2 (26.5, 36.0) | 39.9 (35.6, 44.7)                              | 11.8 (9.6, 14.5)  | 29.5 (24.5, 34.2) |
| 2005   | 37.2 (33.7, 41.0)              | 12.0 (10.2, 14.2) | 32.4 (28.0, 36.5) | 41.0 (37.2, 45.3)                              | 12.1 (10.1, 14.5) | 29.6 (25.1, 33.9) |
| 2006   | 36.8 (33.6, 40.4)              | 12.3 (10.5, 14.5) | 33.5 (29.2, 37.9) | 42.2 (38.5, 46.3)                              | 12.5 (10.6, 14.8) | 29.6 (25.3, 33.7) |
| 2007   | 36.4 (33.0, 40.0)              | 12.6 (10.7, 14.8) | 34.7 (29.9, 39.6) | 43.3 (39.3, 47.6)                              | 12.9 (10.9, 15.3) | 29.8 (25.4, 34.2) |
| 2008   | 35.6 (32.2, 39.4)              | 12.7 (10.7, 15.1) | 35.7 (30.8, 41.2) | 43.5 (39.4, 48.0)                              | 13.2 (11.1, 15.8) | 30.5 (25.8, 35.3) |
| 2009   | 34.3 (31.1, 37.9)              | 12.5 (10.7, 14.7) | 36.5 (31.7, 41.9) | 42.3 (38.4, 46.5)                              | 13.5 (11.3, 16.1) | 32.0 (27.1, 37.3) |
| 2010   | 32.5 (29.8, 35.4)              | 12.0 (10.4, 13.8) | 36.8 (32.6, 41.3) | 39.2 (36.0, 42.6)                              | 13.6 (11.7, 15.9) | 34.8 (30.5, 40.0) |
| 2011   | 30.3 (27.7, 33.2)              | 11.2 (9.6, 13.0)  | 36.8 (32.3, 41.3) | 35.4 (32.3, 38.7)                              | 13.6 (11.7, 15.8) | 38.4 (33.6, 43.6) |
| 2012   | 28.9 (25.9, 32.1)              | 10.5 (8.8, 12.5)  | 36.5 (31.6, 41.6) | 32.8 (29.5, 36.4)                              | 13.3 (11.2, 15.9) | 40.7 (35.2, 47.0) |
| 2013   | 28.8 (26.1, 31.8)              | 10.3 (8.8, 12.0)  | 35.8 (31.5, 40.3) | 32.9 (29.9, 36.1)                              | 12.9 (10.9, 15.2) | 39.3 (34.1, 45.0) |
| 2014   | 30.0 (27.5, 32.8)              | 10.5 (9.0, 12.2)  | 34.9 (30.4, 39.1) | 35.3 (32.3, 38.5)                              | 12.4 (10.6, 14.4) | 35.1 (30.9, 40.1) |
| 2015   | 30.9 (27.8, 34.3)              | 10.7 (9.0, 12.7)  | 34.6 (29.7, 39.2) | 37.2 (33.6, 41.2)                              | 12.0 (10.0, 14.4) | 32.3 (28.2, 37.4) |
| 2016   | 30.0 (27.2, 33.0)              | 10.7 (9.1, 12.5)  | 35.7 (31.1, 40.9) | 36.1 (33.0, 39.6)                              | 11.9 (10.1, 14.0) | 32.9 (28.6, 37.7) |
| 2017   | 27.7 (25.0, 30.7)              | 10.5 (8.9, 12.5)  | 38.0 (32.8, 43.5) | 33.2 (30.0, 36.7)                              | 12.0 (10.1, 14.2) | 36.1 (30.9, 41.3) |
| 2018   | 25.3 (21.3, 30.0)              | 10.4 (7.9, 13.6)  | 41.0 (32.9, 50.3) | 30.0 (25.5, 35.3)                              | 12.1 (9.2, 15.9)  | 40.4 (31.4, 49.9) |

Proportion (%) and 95% confidence interval of cancer death out of all-cause death. Rates and 95% confidence interval are presented per 1000 person-years. IMD: index of multiple deprivation 2010.

**ESM Table 5.** Trends in all-cause and all cancer mortality rate and proportions of cancer death by body mass index

| Period | Normal weight (BMI: 18.5-24.9 kg/m <sup>2</sup> ) |                  |                   | Overweight (BMI: 25-29.9 kg/m <sup>2</sup> ) |                   |                   |
|--------|---------------------------------------------------|------------------|-------------------|----------------------------------------------|-------------------|-------------------|
|        | All-cause                                         | All cancer       | Proportion        | All-cause                                    | All cancer        | Proportion        |
| 1998   | 32.2 (24.4, 42.5)                                 | 9.8 (5.7, 16.9)  | 30.6 (19.0, 49.2) | 30.7 (24.8, 38.0)                            | 6.7 (4.6, 9.8)    | 22.0 (16.3, 29.0) |
| 1999   | 32.5 (25.4, 41.5)                                 | 10.0 (6.2, 16.2) | 30.9 (20.3, 47.5) | 30.4 (25.1, 36.7)                            | 7.1 (5.1, 10.0)   | 23.4 (18.0, 30.0) |
| 2000   | 32.8 (26.5, 40.6)                                 | 10.2 (6.8, 15.5) | 31.3 (21.7, 45.3) | 30.0 (25.4, 35.5)                            | 7.5 (5.6, 10.1)   | 25.0 (19.8, 31.2) |
| 2001   | 33.1 (27.5, 39.7)                                 | 10.5 (7.3, 14.9) | 31.6 (23.1, 43.2) | 29.7 (25.7, 34.4)                            | 7.9 (6.1, 10.3)   | 26.7 (21.8, 32.2) |
| 2002   | 33.4 (28.6, 39.0)                                 | 10.7 (7.9, 14.4) | 32.0 (24.3, 41.6) | 29.4 (26.0, 33.3)                            | 8.4 (6.7, 10.4)   | 28.5 (24.0, 33.5) |
| 2003   | 33.7 (29.6, 38.4)                                 | 10.9 (8.5, 14.0) | 32.3 (25.5, 40.6) | 29.1 (26.2, 32.3)                            | 8.9 (7.4, 10.7)   | 30.4 (26.2, 35.1) |
| 2004   | 34.0 (30.5, 38.0)                                 | 11.1 (8.9, 13.9) | 32.7 (26.6, 39.5) | 28.8 (26.3, 31.4)                            | 9.3 (8.0, 10.9)   | 32.5 (28.8, 36.7) |
| 2005   | 34.3 (31.1, 38.0)                                 | 11.4 (9.2, 14.0) | 33.1 (27.4, 39.4) | 28.4 (26.3, 30.7)                            | 9.9 (8.6, 11.3)   | 34.7 (31.0, 38.6) |
| 2006   | 34.6 (31.3, 38.3)                                 | 11.6 (9.3, 14.4) | 33.4 (27.8, 40.2) | 28.1 (26.2, 30.2)                            | 10.4 (9.2, 11.8)  | 37.0 (33.0, 41.2) |
| 2007   | 34.6 (31.1, 38.6)                                 | 11.7 (9.3, 14.7) | 33.7 (27.9, 41.1) | 27.8 (25.8, 29.9)                            | 11.0 (9.6, 12.5)  | 39.4 (35.0, 44.0) |
| 2008   | 34.2 (30.7, 38.1)                                 | 11.6 (9.3, 14.5) | 33.9 (28.0, 41.8) | 27.4 (25.3, 29.6)                            | 11.4 (9.9, 13.1)  | 41.6 (37.0, 46.7) |
| 2009   | 33.0 (29.9, 36.5)                                 | 11.3 (9.2, 13.8) | 34.1 (28.8, 41.4) | 26.8 (24.8, 29.0)                            | 11.5 (10.1, 13.2) | 43.0 (38.4, 48.1) |
| 2010   | 31.2 (28.4, 34.3)                                 | 10.8 (8.8, 13.3) | 34.6 (29.1, 41.6) | 26.0 (24.2, 27.8)                            | 11.2 (10.0, 12.7) | 43.3 (39.2, 47.5) |
| 2011   | 29.5 (26.3, 33.0)                                 | 10.5 (8.3, 13.3) | 35.5 (29.0, 44.1) | 25.0 (23.3, 26.8)                            | 10.7 (9.4, 12.1)  | 42.6 (38.1, 47.3) |
| 2012   | 28.6 (25.5, 32.2)                                 | 10.6 (8.4, 13.2) | 36.9 (30.2, 44.4) | 24.3 (22.4, 26.4)                            | 10.1 (8.7, 11.7)  | 41.6 (36.6, 47.1) |
| 2013   | 29.0 (26.3, 32.0)                                 | 11.1 (9.1, 13.5) | 38.2 (32.4, 44.8) | 24.5 (22.6, 26.6)                            | 9.9 (8.7, 11.3)   | 40.4 (35.9, 44.9) |
| 2014   | 29.8 (26.7, 33.2)                                 | 11.7 (9.3, 14.6) | 39.3 (32.4, 48.0) | 25.5 (23.8, 27.4)                            | 10.0 (8.8, 11.3)  | 39.0 (35.0, 43.3) |
| 2015   | 29.8 (26.5, 33.4)                                 | 12.0 (9.6, 15.1) | 40.3 (33.1, 49.3) | 25.8 (23.7, 28.1)                            | 9.9 (8.5, 11.5)   | 38.3 (33.4, 43.1) |
| 2016   | 28.6 (25.9, 31.7)                                 | 11.9 (9.7, 14.6) | 41.6 (35.1, 50.0) | 23.8 (22.0, 25.8)                            | 9.4 (8.2, 10.7)   | 39.4 (34.8, 43.8) |
| 2017   | 27.0 (23.8, 30.7)                                 | 11.7 (9.0, 15.2) | 43.2 (34.1, 54.0) | 20.3 (18.7, 22.1)                            | 8.6 (7.4, 10.0)   | 42.4 (37.2, 47.2) |
| 2018   | 25.4 (21.0, 30.9)                                 | 11.4 (7.7, 16.9) | 44.9 (32.0, 61.4) | 16.9 (14.6, 19.6)                            | 7.9 (6.2, 10.1)   | 46.4 (38.2, 55.8) |

  

| Period | Obese (BMI: 30-34.9 kg/m <sup>2</sup> ) |                   |                   | Severely obese (BMI: ≥35 kg/m <sup>2</sup> ) |                   |                   |
|--------|-----------------------------------------|-------------------|-------------------|----------------------------------------------|-------------------|-------------------|
|        | All-cause                               | All cancer        | Proportion        | All-cause                                    | All cancer        | Proportion        |
| 1998   | 35.8 (27.6, 46.6)                       | 9.4 (6.3, 14.1)   | 26.2 (19.2, 35.0) | 31.9 (21.9, 46.4)                            | 3.6 (1.5, 8.4)    | 11.2 (4.8, 23.2)  |
| 1999   | 35.3 (27.9, 44.7)                       | 9.7 (6.7, 13.9)   | 27.4 (20.6, 35.4) | 32.2 (23.0, 45.2)                            | 4.0 (1.8, 8.7)    | 12.4 (5.7, 23.8)  |
| 2000   | 34.8 (28.2, 42.9)                       | 10.0 (7.2, 13.8)  | 28.7 (22.2, 35.9) | 32.6 (24.1, 44.1)                            | 4.5 (2.2, 9.0)    | 13.8 (6.9, 24.5)  |
| 2001   | 34.3 (28.6, 41.2)                       | 10.3 (7.8, 13.6)  | 30.0 (23.9, 36.5) | 33.0 (25.2, 43.1)                            | 5.1 (2.7, 9.3)    | 15.3 (8.3, 25.4)  |
| 2002   | 33.8 (28.9, 39.6)                       | 10.6 (8.3, 13.5)  | 31.3 (25.7, 37.2) | 33.3 (26.4, 42.1)                            | 5.7 (3.3, 9.7)    | 17.1 (9.9, 26.3)  |
| 2003   | 33.4 (29.1, 38.2)                       | 10.9 (8.9, 13.4)  | 32.7 (27.6, 38.0) | 33.7 (27.6, 41.1)                            | 6.4 (4.0, 10.1)   | 18.9 (11.9, 27.3) |
| 2004   | 32.9 (29.3, 36.8)                       | 11.2 (9.4, 13.4)  | 34.2 (29.7, 39.0) | 34.1 (28.8, 40.3)                            | 7.2 (4.9, 10.5)   | 21.1 (14.1, 28.7) |
| 2005   | 32.4 (29.4, 35.7)                       | 11.6 (9.9, 13.5)  | 35.7 (31.7, 40.2) | 34.4 (29.9, 39.7)                            | 8.1 (5.9, 11.1)   | 23.4 (16.9, 30.0) |
| 2006   | 31.9 (29.3, 34.8)                       | 11.9 (10.4, 13.7) | 37.4 (33.5, 41.5) | 34.8 (30.9, 39.2)                            | 9.1 (7.0, 11.8)   | 26.0 (19.8, 31.9) |
| 2007   | 31.5 (29.0, 34.2)                       | 12.3 (10.7, 14.1) | 39.0 (35.2, 42.9) | 35.2 (31.6, 39.1)                            | 10.2 (8.1, 12.7)  | 28.9 (23.1, 34.6) |
| 2008   | 31.0 (28.3, 33.8)                       | 12.5 (10.9, 14.4) | 40.5 (36.6, 44.8) | 35.5 (32.0, 39.5)                            | 11.4 (9.2, 14.2)  | 32.1 (26.1, 38.3) |
| 2009   | 30.1 (27.5, 33.1)                       | 12.5 (10.8, 14.4) | 41.5 (37.5, 46.0) | 35.7 (31.9, 39.9)                            | 12.6 (10.0, 15.8) | 35.2 (27.9, 42.1) |
| 2010   | 28.9 (26.5, 31.5)                       | 12.0 (10.5, 13.7) | 41.6 (38.0, 45.8) | 35.4 (31.7, 39.6)                            | 13.3 (10.6, 16.7) | 37.4 (30.1, 44.6) |
| 2011   | 27.1 (25.1, 29.3)                       | 11.0 (9.8, 12.5)  | 40.8 (37.2, 44.9) | 34.5 (31.3, 38.1)                            | 13.1 (10.7, 16.0) | 37.9 (31.3, 44.6) |
| 2012   | 25.2 (23.0, 27.6)                       | 10.1 (8.7, 11.6)  | 39.9 (35.5, 44.8) | 33.0 (30.0, 36.2)                            | 11.9 (9.7, 14.6)  | 36.2 (30.2, 42.3) |
| 2013   | 24.0 (21.7, 26.5)                       | 9.5 (8.2, 11.1)   | 39.8 (35.4, 44.8) | 31.5 (28.1, 35.4)                            | 10.7 (8.3, 13.7)  | 33.9 (27.0, 41.3) |
| 2014   | 23.9 (22.0, 26.1)                       | 9.7 (8.6, 11.0)   | 40.6 (36.4, 44.6) | 31.2 (28.0, 34.7)                            | 10.2 (8.2, 12.8)  | 32.8 (27.0, 39.3) |
| 2015   | 24.5 (22.3, 27.0)                       | 10.1 (8.7, 11.7)  | 41.3 (36.4, 46.0) | 32.0 (29.0, 35.3)                            | 10.6 (8.5, 13.2)  | 33.1 (27.1, 40.2) |
| 2016   | 24.6 (22.3, 27.1)                       | 10.2 (8.9, 11.8)  | 41.7 (37.2, 47.0) | 32.2 (28.7, 36.0)                            | 11.1 (8.8, 14.1)  | 34.7 (28.4, 42.2) |
| 2017   | 23.8 (21.7, 26.1)                       | 10.0 (8.7, 11.5)  | 42.0 (37.7, 46.5) | 30.7 (27.8, 33.8)                            | 11.5 (9.4, 14.1)  | 37.6 (31.3, 43.5) |
| 2018   | 22.7 (19.4, 26.6)                       | 9.6 (7.7, 12.1)   | 42.4 (35.2, 50.0) | 28.6 (24.2, 33.8)                            | 11.8 (8.4, 16.6)  | 41.4 (29.7, 53.7) |

Proportion (%) and 95% confidence interval of cancer death out of all-cause death.

Rates and 95% confidence interval are presented per 1000 person-years.

BMI: body mass index. Subjects with underweight (BMI: <18.5 kg/m<sup>2</sup>) were not included in this analysis.

**ESM Table 6.** Trends in all-cause and all cancer mortality rate and proportions of cancer death by smoking status

| Period | Current smoker    |                   |                   | Non-smoker        |                 |                   | Ex-smoker         |                   |                   |
|--------|-------------------|-------------------|-------------------|-------------------|-----------------|-------------------|-------------------|-------------------|-------------------|
|        | All-cause         | All cancer        | Proportion        | All-cause         | All cancer      | Proportion        | All-cause         | All cancer        | Proportion        |
| 1998   | 40.0 (29.5, 54.3) | 8.8 (4.8, 16.1)   | 22.0 (12.9, 33.6) | 24.9 (20.6, 30.2) | 8.1 (5.8, 11.3) | 32.4 (24.3, 41.0) | 36.3 (28.9, 45.5) | 8.5 (5.8, 12.6)   | 23.5 (16.7, 31.6) |
| 1999   | 41.0 (31.3, 53.7) | 9.4 (5.5, 16.1)   | 22.8 (14.2, 33.5) | 24.8 (20.9, 29.4) | 8.2 (6.1, 11.1) | 33.1 (25.6, 40.6) | 36.0 (29.4, 44.1) | 8.8 (6.2, 12.5)   | 24.6 (18.1, 32.2) |
| 2000   | 42.0 (33.2, 53.3) | 10.0 (6.2, 16.0)  | 23.7 (15.7, 33.3) | 24.6 (21.2, 28.6) | 8.4 (6.4, 10.9) | 33.9 (26.9, 40.4) | 35.7 (29.8, 42.7) | 9.2 (6.7, 12.5)   | 25.8 (19.8, 32.6) |
| 2001   | 43.1 (35.1, 52.8) | 10.6 (7.1, 16.0)  | 24.7 (17.1, 33.1) | 24.5 (21.5, 27.9) | 8.5 (6.8, 10.7) | 34.7 (28.4, 40.4) | 35.4 (30.2, 41.4) | 9.6 (7.3, 12.5)   | 27.0 (21.4, 33.3) |
| 2002   | 44.1 (37.1, 52.5) | 11.3 (8.0, 16.0)  | 25.6 (18.8, 33.1) | 24.4 (21.8, 27.2) | 8.6 (7.1, 10.5) | 35.5 (29.8, 40.5) | 35.1 (30.7, 40.2) | 9.9 (7.9, 12.5)   | 28.3 (23.3, 34.1) |
| 2003   | 45.2 (39.1, 52.3) | 12.1 (9.0, 16.2)  | 26.7 (20.6, 33.1) | 24.2 (22.1, 26.6) | 8.8 (7.5, 10.4) | 36.3 (31.2, 40.6) | 34.8 (31.0, 39.1) | 10.3 (8.5, 12.6)  | 29.6 (25.0, 34.9) |
| 2004   | 46.3 (41.0, 52.4) | 12.8 (10.1, 16.4) | 27.7 (22.3, 33.3) | 24.1 (22.3, 26.0) | 8.9 (7.8, 10.3) | 37.1 (32.7, 41.0) | 34.5 (31.4, 38.1) | 10.7 (9.1, 12.7)  | 31.0 (27.1, 35.7) |
| 2005   | 47.5 (42.7, 52.8) | 13.7 (11.1, 16.9) | 28.8 (24.4, 34.0) | 24.0 (22.4, 25.6) | 9.1 (8.0, 10.3) | 38.0 (34.0, 41.9) | 34.3 (31.6, 37.2) | 11.1 (9.7, 12.9)  | 32.5 (28.7, 37.0) |
| 2006   | 48.7 (44.0, 53.8) | 14.6 (12.0, 17.7) | 30.0 (25.4, 35.1) | 23.8 (22.3, 25.4) | 9.3 (8.2, 10.5) | 38.8 (34.7, 43.0) | 34.0 (31.6, 36.6) | 11.6 (10.2, 13.2) | 34.1 (30.3, 38.1) |
| 2007   | 49.7 (44.7, 55.3) | 15.5 (12.7, 19.0) | 31.2 (25.9, 37.0) | 23.6 (22.1, 25.3) | 9.4 (8.2, 10.7) | 39.7 (35.5, 44.1) | 33.7 (31.4, 36.2) | 12.0 (10.6, 13.6) | 35.7 (32.0, 39.6) |
| 2008   | 50.3 (45.0, 56.2) | 16.4 (13.2, 20.2) | 32.5 (26.7, 39.4) | 23.2 (21.6, 24.9) | 9.4 (8.2, 10.7) | 40.4 (35.9, 45.1) | 33.3 (30.9, 36.0) | 12.4 (10.9, 14.2) | 37.2 (33.5, 41.4) |
| 2009   | 50.2 (45.2, 55.8) | 17.1 (14.0, 21.0) | 34.1 (28.4, 40.8) | 22.4 (20.9, 24.0) | 9.2 (8.1, 10.5) | 41.2 (36.9, 45.6) | 32.7 (30.2, 35.4) | 12.5 (10.9, 14.3) | 38.3 (34.2, 42.7) |
| 2010   | 49.1 (44.8, 53.8) | 17.6 (14.7, 21.0) | 35.9 (31.1, 41.3) | 21.1 (19.8, 22.4) | 8.8 (7.9, 9.9)  | 41.8 (37.9, 45.9) | 31.6 (29.4, 34.0) | 12.2 (10.8, 13.8) | 38.5 (34.7, 42.6) |
| 2011   | 47.3 (43.0, 52.1) | 17.8 (14.8, 21.3) | 37.6 (32.6, 43.4) | 19.6 (18.3, 20.9) | 8.3 (7.3, 9.4)  | 42.4 (37.8, 47.1) | 30.1 (28.2, 32.2) | 11.4 (10.2, 12.8) | 38.0 (34.4, 41.6) |
| 2012   | 45.8 (41.0, 51.2) | 17.7 (14.4, 21.9) | 38.7 (32.6, 46.2) | 18.4 (17.0, 19.9) | 7.8 (6.8, 9.0)  | 42.3 (36.8, 47.5) | 28.6 (26.5, 30.9) | 10.7 (9.3, 12.2)  | 37.2 (33.3, 41.6) |
| 2013   | 45.3 (41.0, 50.1) | 17.5 (14.4, 21.1) | 38.5 (32.5, 44.8) | 18.1 (16.8, 19.4) | 7.4 (6.5, 8.4)  | 40.9 (36.5, 45.3) | 28.0 (25.8, 30.5) | 10.3 (9.0, 11.8)  | 36.9 (33.0, 41.1) |
| 2014   | 45.8 (41.8, 50.2) | 17.1 (14.4, 20.4) | 37.4 (31.8, 43.4) | 18.5 (17.3, 19.7) | 7.1 (6.2, 8.0)  | 38.4 (34.3, 43.1) | 28.8 (26.9, 30.8) | 10.6 (9.5, 11.9)  | 36.9 (33.3, 40.5) |
| 2015   | 46.2 (41.4, 51.4) | 16.9 (13.8, 20.8) | 36.7 (30.7, 44.2) | 18.6 (17.2, 20.2) | 6.8 (5.9, 7.9)  | 36.7 (32.3, 41.8) | 29.7 (27.4, 32.1) | 11.0 (9.6, 12.6)  | 37.0 (33.2, 41.6) |
| 2016   | 45.6 (41.4, 50.3) | 16.9 (14.1, 20.4) | 37.2 (31.6, 43.6) | 17.6 (16.4, 18.9) | 6.6 (5.8, 7.5)  | 37.3 (33.4, 41.8) | 29.1 (26.9, 31.4) | 10.9 (9.6, 12.4)  | 37.5 (33.9, 41.7) |
| 2017   | 44.3 (40.1, 49.0) | 17.1 (14.2, 20.7) | 38.6 (31.9, 44.1) | 15.9 (14.7, 17.2) | 6.3 (5.5, 7.3)  | 39.8 (35.3, 44.5) | 27.0 (25.0, 29.1) | 10.4 (9.1, 11.9)  | 38.6 (35.0, 42.5) |
| 2018   | 42.9 (36.5, 50.5) | 17.4 (12.8, 23.5) | 40.5 (31.0, 51.1) | 14.1 (12.4, 16.0) | 6.1 (4.8, 7.7)  | 43.1 (35.1, 52.0) | 24.6 (21.6, 28.1) | 9.9 (7.9, 12.3)   | 40.0 (34.0, 47.0) |

Proportion (%) and 95% confidence interval of cancer death out of all-cause death.

Rates and 95% confidence interval are presented per 1000 person-years.



**ESM Table 7. Annual percentage change and average annual percentage change in cancer-specific mortality rates (four most common cancers)**

|                                    | <i>Period 1</i> | <i>APC, %</i>        | <i>Period 2</i> | <i>APC, %</i>        | <i>Period 3</i> | <i>APC, %</i>        | <i>Period 4</i> | <i>APC, %</i>        | <i>AAPC for whole period, %</i> |
|------------------------------------|-----------------|----------------------|-----------------|----------------------|-----------------|----------------------|-----------------|----------------------|---------------------------------|
| <b>Breast</b>                      |                 |                      |                 |                      |                 |                      |                 |                      |                                 |
| <b>Age, years</b>                  |                 |                      |                 |                      |                 |                      |                 |                      |                                 |
| 55                                 | 1998-2006       | 12.7 (11.6, 13.8)    | 2006-2009       | 8.7 (6.3, 11.1)      | 2009-2015       | -3.1 (-3.5, -2.7)    | 2015-2018       | -6.7 (-8.4, -5.0)    | 4.1 (3.6, 4.7)                  |
| 65                                 | 1998-2008       | 9.5 (8.2, 10.7)      | 2008-2015       | -5.9 (-6.8, -4.9)    | 2015-2018       | -15.3 (-22.2, -7.9)  | –               | –                    | -0.1 (-1.4, 1.2)                |
| 75                                 | 1998-2008       | 3.6 (3.4, 3.8)       | 2008-2012       | -8.3 (-8.9, -7.6)    | 2012-2015       | 9.9 (8.4, 11.5)      | 2015-2018       | -12.7 (-13.6, -11.7) | -0.6 (-0.9, -0.3)               |
| 85                                 | 1998-2008       | -0.2 (-0.3, -0.2)    | 2008-2012       | 2.7 (2.6, 2.8)       | 2012-2015       | -7.2 (-7.4, -6.9)    | 2015-2018       | 1.4 (1.2, 1.6)       | -0.5 (-0.5, -0.4)               |
| <b>Ethnicity</b>                   |                 |                      |                 |                      |                 |                      |                 |                      |                                 |
| White                              | 1998-2009       | 8.6 (8.2, 9.0)       | 2009-2012       | -10.7 (-12.5, -8.8)  | 2012-2015       | 1.8 (-0.8, 4.4)      | 2015-2018       | -15.9 (-18.1, -13.7) | 0.5 (-0.1, 1.1)                 |
| Others                             | 1998-2008       | -33.1 (-34.3, -32.0) | 2008-2014       | 55.7 (8.6, 123.1)    | 2014-2018       | -30.3 (-43.1, -14.6) | –               | –                    | -13.1 (-21.8, -3.5)             |
| <b>Deprivation</b>                 |                 |                      |                 |                      |                 |                      |                 |                      |                                 |
| Least deprived                     | 1998-2009       | 5.5 (5.0, 6.0)       | 2009-2012       | -23.6 (-26.7, -20.3) | 2012-2015       | 47.5 (40.7, 54.6)    | 2015-2018       | -32.4 (-35.7, -29.0) | -1.1 (-2.2, 0.0)                |
| Most deprived                      | 1998-2008       | -11.6 (-12.2, -11.0) | 2008-2012       | 38.2 (33.8, 42.8)    | 2012-2016       | -27.8 (-30.2, -25.3) | 2016-2018       | 10.4 (-4.4, 27.5)    | -5.1 (-6.6, -3.6)               |
| <b>BMI group, kg/m<sup>2</sup></b> |                 |                      |                 |                      |                 |                      |                 |                      |                                 |
| 18.5-24.9                          | 1998-2008       | 1.6 (1.4, 1.7)       | 2008-2011       | -10.4 (-11.4, -9.5)  | 2011-2015       | 1.8 (1.1, 2.5)       | 2015-2018       | -27.6 (-29.1, -26.0) | -5.2 (-5.5, -4.9)               |
| 25.0-29.9                          | 1998-2006       | 7.8 (6.0, 9.6)       | 2006-2009       | 4.1 (-0.8, 9.3)      | 2009-2012       | -12.1 (-16.7, -7.3)  | 2012-2018       | -2.7 (-4.4, -1.0)    | 0.8 (-0.4, 2.1)                 |
| 30.0-34.9                          | 1998-2009       | 21.7 (20.8, 22.7)    | 2009-2012       | -21.9 (-24.0, -19.7) | 2012-2015       | 16.5 (12.8, 20.4)    | 2015-2018       | -30.6 (-33.4, -27.7) | 4.0 (3.1, 4.9)                  |
| ≥35.0                              | 1998-2007       | 6.3 (5.7, 7.0)       | 2007-2010       | 1.5 (-0.9, 4.0)      | 2010-2015       | -10.5 (-11.3, -9.6)  | 2015-2018       | -28.9 (-33.9, -23.6) | -4.8 (-5.8, -3.8)               |
| <b>Smoking status</b>              |                 |                      |                 |                      |                 |                      |                 |                      |                                 |
| Current smoker                     | 1998-2008       | 1.8 (1.4, 2.1)       | 2008-2014       | -6.8 (-7.4, -6.2)    | 2014-2018       | -22.1 (-24.6, -19.5) | –               | –                    | -6.1 (-6.6, -5.5)               |
| Ex-smoker                          | 1998-2009       | 11.0 (10.2, 11.8)    | 2009-2012       | -25.2 (-28.5, -21.7) | 2012-2015       | 26.3 (18.9, 34.2)    | 2015-2018       | -26.4 (-30.9, -21.7) | 0.3 (-1.0, 1.6)                 |
| Non-smoker                         | 1998-2008       | 7.6 (7.4, 7.8)       | 2008-2011       | -1.6 (-2.3, -0.9)    | 2011-2018       | -10.7 (-10.9, -10.5) | –               | –                    | -0.5 (-0.7, -0.4)               |
| <b>Prostate</b>                    |                 |                      |                 |                      |                 |                      |                 |                      |                                 |
| <b>Age, years</b>                  |                 |                      |                 |                      |                 |                      |                 |                      |                                 |
| 55                                 | 1998-2012       | -5.0 (-5.1, -4.9)    | 2012-2016       | 19.3 (18.5, 20.2)    | 2016-2018       | -26.5 (-28.4, -24.6) | –               | –                    | -3.1 (-3.3, -2.8)               |
| 65                                 | 1998-2012       | -1.4 (-1.5, -1.4)    | 2012-2016       | 13.1 (12.6, 13.6)    | 2016-2018       | -23.3 (-24.6, -22.0) | –               | –                    | -1.2 (-1.4, -1.0)               |
| 75                                 | 1998-2011       | 1.6 (1.5, 1.7)       | 2011-2016       | 5.0 (4.7, 5.4)       | 2016-2018       | -14.1 (-15.6, -12.4) | –               | –                    | 0.8 (0.6, 1.0)                  |
| 85                                 | 1998-2009       | 8.1 (7.9, 8.2)       | 2009-2013       | 2.9 (2.5, 3.2)       | 2013-2016       | 9.2 (8.7, 9.8)       | 2016-2018       | -6.8 (-7.4, -6.2)    | 5.6 (5.5, 5.7)                  |
| <b>Ethnicity</b>                   |                 |                      |                 |                      |                 |                      |                 |                      |                                 |
| White                              | 1998-2012       | 3.6 (3.6, 3.6)       | 2012-2016       | 10.0 (9.9, 10.2)     | 2016-2018       | -17.4 (-17.7, -17.0) | –               | –                    | 2.5 (2.5, 2.6)                  |
| Others                             | 1998-2008       | 42.4 (15.9, 75.0)    | 2008-2018       | -15.2 (-21.0, -8.9)  | –               | –                    | –               | –                    | 9.9 (-0.6, 21.6)                |
| <b>Deprivation</b>                 |                 |                      |                 |                      |                 |                      |                 |                      |                                 |
| Least deprived                     | 1998-2008       | -7.8 (-8.1, -7.4)    | 2008-2014       | 5.6 (4.6, 6.5)       | 2014-2018       | -20.3 (-22.7, -17.9) | –               | –                    | -6.7 (-7.3, -6.1)               |
| Most deprived                      | 1998-2009       | 7.2 (6.6, 7.8)       | 2009-2012       | -27.9 (-31.4, -24.3) | 2012-2016       | 42.4 (37.9, 47.1)    | 2016-2018       | -38.2 (-43.1, -32.8) | 1.2 (0.0, 2.4)                  |
| <b>BMI group, kg/m<sup>2</sup></b> |                 |                      |                 |                      |                 |                      |                 |                      |                                 |
| 18.5-24.9                          | 1998-2012       | 7.7 (7.5, 8.0)       | 2012-2015       | 25.2 (23.7, 26.7)    | 2015-2018       | -26.1 (-27.6, -24.5) | –               | –                    | 4.1 (3.8, 4.5)                  |
| 25.0-29.9                          | 1998-2008       | -9.6 (-9.7, -9.5)    | 2008-2011       | -0.9 (-2.7, 1.0)     | 2011-2015       | 13.3 (12.6, 14.1)    | 2015-2018       | -10.4 (-11.2, -9.5)  | -4.2 (-4.5, -3.9)               |
| 30.0-34.9                          | 1998-2010       | 2.3 (2.2, 2.4)       | 2010-2013       | -6.0 (-6.9, -5.1)    | 2013-2016       | 0.7 (-0.5, 1.9)      | 2016-2018       | -4.0 (-5.6, -2.3)    | 0.1 (-0.1, 0.4)                 |
| ≥35.0                              | 1998-2015       | 24.2 (22.2, 26.2)    | 2015-2018       | -25.3 (-32.6, -17.3) | –               | –                    | –               | –                    | 15.1 (12.9, 17.3)               |
| <b>Smoking status</b>              |                 |                      |                 |                      |                 |                      |                 |                      |                                 |
| Current smoker                     | 1998-2009       | 3.7 (3.5, 3.9)       | 2009-2013       | 15.9 (15.5, 16.4)    | 2013-2016       | -5.3 (-5.8, -4.8)    | 2016-2018       | -11.4 (-12.4, -10.4) | 3.0 (2.8, 3.1)                  |
| Ex-smoker                          | 1998-2008       | 8.5 (8.3, 8.8)       | 2008-2011       | 5.9 (5.0, 6.8)       | 2011-2016       | -2.1 (-2.3, -1.8)    | 2016-2018       | -6.8 (-8.1, -5.4)    | 3.8 (3.6, 4.0)                  |
| Non-smoker                         | 1998-2012       | -6.1 (-6.7, -5.5)    | 2012-2016       | 29.0 (22.0, 36.5)    | 2016-2018       | -37.8 (-50.0, -22.6) | –               | –                    | -4.0 (-6.1, -1.8)               |
| <b>Lung</b>                        |                 |                      |                 |                      |                 |                      |                 |                      |                                 |
| <b>Age, years</b>                  |                 |                      |                 |                      |                 |                      |                 |                      |                                 |
| 55                                 | 1998-2010       | 8.5 (8.4, 8.7)       | 2010-2013       | 0.6 (-0.2, 1.3)      | 2013-2018       | -16.9 (-17.2, -16.5) | –               | –                    | 0.4 (0.2, 0.5)                  |
| 65                                 | 1998-2009       | 3.5 (3.5, 3.6)       | 2009-2012       | 1.2 (1.0, 1.4)       | 2012-2015       | -8.6 (-8.9, -8.4)    | 2015-2018       | -0.4 (-0.6, -0.2)    | 0.7 (0.6, 0.7)                  |
| 75                                 | 1998-2009       | 8.6 (8.4, 8.9)       | 2009-2012       | -3.8 (-4.8, -2.8)    | 2012-2015       | 2.0 (0.9, 3.2)       | 2015-2018       | -9.8 (-10.7, -8.9)   | 2.8 (2.5, 3.0)                  |
| 85                                 | 1998-2009       | 5.7 (5.5, 5.9)       | 2009-2012       | -3.9 (-4.9, -2.8)    | 2012-2015       | 7.5 (6.4, 8.6)       | 2015-2018       | -14.0 (-14.7, -13.2) | 1.3 (1.1, 1.6)                  |
| <b>Gender</b>                      |                 |                      |                 |                      |                 |                      |                 |                      |                                 |
| Men                                | 1998-2006       | 3.6 (3.5, 3.7)       | 2006-2009       | 2.3 (2.0, 2.6)       | 2009-2013       | -4.2 (-4.3, -4.1)    | 2013-2018       | -0.2 (-0.3, -0.1)    | 0.9 (0.8, 0.9)                  |

|                                    | <i>Period 1</i> | <i>APC, %</i>        | <i>Period 2</i> | <i>APC, %</i>        | <i>Period 3</i> | <i>APC, %</i>        | <i>Period 4</i> | <i>APC, %</i>        | <i>AAPC for whole period, %</i> |
|------------------------------------|-----------------|----------------------|-----------------|----------------------|-----------------|----------------------|-----------------|----------------------|---------------------------------|
| <b>Women</b>                       | 1998-2009       | 8.9 (8.9, 9.0)       | 2009-2012       | 2.0 (1.6, 2.3)       | 2012-2015       | -5.0 (-5.3, -4.6)    | 2015-2018       | -0.4 (-0.6, -0.1)    | 4.3 (4.2, 4.4)                  |
| <b>Ethnicity</b>                   |                 |                      |                 |                      |                 |                      |                 |                      |                                 |
| White                              | 1998-2007       | 7.3 (7.2, 7.4)       | 2007-2010       | 5.0 (4.6, 5.5)       | 2010-2015       | -2.3 (-2.4, -2.2)    | 2015-2018       | 0.7 (0.4, 0.9)       | 3.5 (3.4, 3.6)                  |
| Others                             | 1998-2010       | -17.7 (-17.8, -17.7) | 2010-2013       | -6.1 (-9.4, -2.7)    | 2013-2016       | 28.8 (25.2, 32.6)    | 2016-2018       | -6.6 (-9.1, -4.1)    | -9.1 (-9.7, -8.5)               |
| <b>Deprivation</b>                 |                 |                      |                 |                      |                 |                      |                 |                      |                                 |
| Least deprived                     | 1998-2008       | 10.7 (10.5, 11.0)    | 2008-2011       | 5.7 (5.0, 6.5)       | 2011-2015       | -17.7 (-18.2, -17.3) | 2015-2018       | -0.7 (-1.7, 0.4)     | 1.9 (1.7, 2.2)                  |
| Most deprived                      | 1998-2008       | 7.7 (7.6, 7.9)       | 2008-2012       | 9.8 (9.6, 10.0)      | 2012-2016       | -5.9 (-6.1, -5.7)    | 2016-2018       | 2.7 (2.1, 3.2)       | 4.8 (4.7, 4.9)                  |
| <b>BMI group, kg/m<sup>2</sup></b> |                 |                      |                 |                      |                 |                      |                 |                      |                                 |
| 18.5-24.9                          | 1998-2008       | 11.1 (10.7, 11.4)    | 2008-2012       | -8.2 (-8.8, -7.5)    | 2012-2015       | 10.1 (8.6, 11.6)     | 2015-2018       | -13.3 (-14.3, -12.3) | 2.9 (2.6, 3.2)                  |
| 25.0-29.9                          | 1998-2009       | 1.8 (1.7, 1.8)       | 2009-2012       | -0.5 (-0.7, -0.3)    | 2012-2018       | -5.0 (-5.0, -4.9)    | –               | –                    | -0.6 (-0.7, -0.6)               |
| 30.0-34.9                          | 1998-2008       | 2.1 (1.7, 2.5)       | 2008-2015       | 5.3 (5.0, 5.6)       | 2015-2018       | -17.7 (-19.0, -16.4) | –               | –                    | -0.1 (-0.4, 0.2)                |
| ≥35.0                              | 1998-2009       | 33.5 (24.7, 43.0)    | 2009-2013       | -17.6 (-24.2, -10.3) | 2013-2018       | 20.2 (16.3, 24.2)    | –               | –                    | 18.1 (13.7, 22.7)               |
| <b>Smoking status</b>              |                 |                      |                 |                      |                 |                      |                 |                      |                                 |
| Current smoker                     | 1998-2009       | 5.5 (4.7, 6.3)       | 2009-2012       | 12.6 (8.5, 16.9)     | 2012-2018       | -6.8 (-7.6, -6.1)    | –               | –                    | 2.6 (1.9, 3.3)                  |
| Ex-smoker                          | 1998-2009       | 13.8 (13.5, 14.1)    | 2009-2013       | -9.7 (-10.3, -9.2)   | 2013-2018       | 1.8 (1.4, 2.2)       | –               | –                    | 5.7 (5.5, 5.9)                  |
| Non-smoker                         | 1998-2008       | -13.4 (-13.4, -13.4) | 2008-2011       | -11.9 (-12.2, -11.6) | 2011-2015       | 3.8 (3.6, 4.0)       | 2015-2018       | -19.8 (-20.1, -19.4) | -11.0 (-11.1, -10.9)            |
| <b>Colorectal</b>                  |                 |                      |                 |                      |                 |                      |                 |                      |                                 |
| <b>Age, years</b>                  |                 |                      |                 |                      |                 |                      |                 |                      |                                 |
| 55                                 | 1998-2006       | 10.1 (9.0, 11.3)     | 2006-2009       | 3.7 (0.8, 6.7)       | 2009-2012       | -15.0 (-17.9, -11.9) | 2012-2018       | 3.8 (2.9, 4.7)       | 3.1 (2.4, 3.9)                  |
| 65                                 | 1998-2007       | 3.7 (3.6, 3.9)       | 2007-2010       | -0.7 (-1.4, 0.1)     | 2010-2015       | -8.3 (-8.6, -8.1)    | 2015-2018       | 14.2 (13.5, 14.9)    | 1.4 (1.2, 1.5)                  |
| 75                                 | 1998-2006       | 3.5 (3.2, 3.8)       | 2006-2009       | 0.9 (-0.3, 2.1)      | 2009-2013       | -8.7 (-9.4, -8.1)    | 2013-2018       | -0.7 (-1.1, -0.2)    | -0.5 (-0.7, -0.2)               |
| 85                                 | 1998-2008       | 5.4 (5.2, 5.5)       | 2008-2012       | -0.6 (-0.9, -0.2)    | 2012-2015       | 2.5 (1.8, 3.1)       | 2015-2018       | -7.4 (-7.8, -6.9)    | 1.7 (1.6, 1.9)                  |
| <b>Gender</b>                      |                 |                      |                 |                      |                 |                      |                 |                      |                                 |
| Men                                | 1998-2008       | 0.4 (0.3, 0.4)       | 2008-2011       | -1.7 (-2.0, -1.4)    | 2011-2015       | -9.2 (-9.3, -9.0)    | 2015-2018       | 1.0 (0.7, 1.3)       | -1.8 (-1.9, -1.8)               |
| Women                              | 1998-2006       | 9.4 (8.0, 10.8)      | 2006-2009       | 4.6 (0.7, 8.6)       | 2009-2014       | -12.4 (-13.9, -11.0) | 2014-2018       | 23.6 (21.5, 25.7)    | 5.3 (4.4, 6.2)                  |
| <b>Ethnicity</b>                   |                 |                      |                 |                      |                 |                      |                 |                      |                                 |
| White                              |                 |                      |                 |                      |                 |                      |                 |                      |                                 |
| Others                             | 1998-2009       | 3.7 (3.6, 3.8)       | 2009-2012       | -1.2 (-1.9, -0.5)    | 2012-2015       | -11.6 (-12.5, -10.8) | 2015-2018       | 14.2 (13.5, 14.8)    | 2.0 (1.8, 2.2)                  |
| <b>Deprivation</b>                 | 1998-2010       | -10.1 (-10.1, -10.1) | 2010-2013       | 20.1 (19.8, 20.4)    | 2013-2016       | -24.9 (-25.1, -24.7) | 2016-2018       | 21.2 (20.8, 21.7)    | -5.8 (-5.9, -5.8)               |
| Least deprived                     |                 |                      |                 |                      |                 |                      |                 |                      |                                 |
| Most deprived                      | 1998-2008       | -1.6 (-1.7, -1.5)    | 2008-2011       | 3.0 (2.4, 3.6)       | 2011-2015       | -20.3 (-20.7, -19.9) | 2015-2018       | 15.2 (14.4, 16.0)    | -2.7 (-2.9, -2.6)               |
| <b>BMI group, kg/m<sup>2</sup></b> | 1998-2008       | 14.9 (14.3, 15.5)    | 2008-2011       | 6.5 (5.0, 8.0)       | 2011-2015       | -18.2 (-19.1, -17.4) | 2015-2018       | 51.3 (50.1, 52.6)    | 10.6 (10.2, 11.0)               |
| 18.5-24.9                          |                 |                      |                 |                      |                 |                      |                 |                      |                                 |
| 25.0-29.9                          | 1998-2007       | -9.6 (-10.0, -9.2)   | 2007-2015       | 6.7 (6.2, 7.3)       | 2015-2018       | 11.1 (9.6, 12.6)     | –               | –                    | -0.3 (-0.7, 0.0)                |
| 30.0-34.9                          | 1998-2008       | 5.0 (4.9, 5.1)       | 2008-2011       | -2.3 (-2.9, -1.8)    | 2011-2015       | -15.9 (-16.3, -15.4) | 2015-2018       | 12.1 (11.3, 12.9)    | 0.3 (0.2, 0.5)                  |
| ≥35.0                              | 1998-2009       | 0.8 (0.5, 1.0)       | 2009-2013       | -8.0 (-9.1, -6.9)    | 2013-2018       | -0.3 (-1.1, 0.5)     | –               | –                    | -1.3 (-1.6, -1.0)               |
| <b>Smoking status</b>              | 1998-2012       | 1.7 (1.6, 1.8)       | 2012-2016       | -7.0 (-7.7, -6.3)    | 2016-2018       | 46.6 (45.1, 48.2)    | –               | –                    | 3.6 (3.4, 3.8)                  |
| Current smoker                     |                 |                      |                 |                      |                 |                      |                 |                      |                                 |
| Ex-smoker                          | 1998-2008       | -1.4 (-1.5, -1.3)    | 2008-2012       | 8.1 (7.5, 8.6)       | 2012-2015       | -17.4 (-18.3, -16.5) | 2015-2018       | 30.2 (29.6, 30.9)    | 2.0 (1.8, 2.2)                  |
| Non-smoker                         | 1998-2008       | 0.2 (0.0, 0.5)       | 2008-2015       | -4.1 (-4.5, -3.8)    | 2015-2018       | 19.9 (18.7, 21.1)    | –               | –                    | 1.4 (1.1, 1.6)                  |

APC: Annual Percentage Change; AAPC: Average Annual Percentage Change. –: Not applicable. Different number of segments for each stratum (period 1 to 4) are identified by Joinpoint regressions.

**ESM Table 8.** Annual percentage change and average annual percentage change in cancer-specific mortality rates (four type 2 diabetes-related cancers)

|                                    | Period 1  | APC, %            | Period 2  | APC, %               | Period 3  | APC, %               | Period 4  | APC, %               | AAPC for whole period, % |
|------------------------------------|-----------|-------------------|-----------|----------------------|-----------|----------------------|-----------|----------------------|--------------------------|
| <b>Pancreas</b>                    |           |                   |           |                      |           |                      |           |                      |                          |
| <b>Age, years</b>                  |           |                   |           |                      |           |                      |           |                      |                          |
| 55                                 | 1998-2007 | 6.7 (6.4, 6.9)    | 2007-2010 | 0.1 (-0.9, 1.1)      | 2010-2014 | -9.3 (-9.9, -8.7)    | 2014-2018 | 5.2 (4.5, 5.9)       | 2.0 (1.8, 2.2)           |
| 65                                 | 1998-2008 | 15.0 (14.1, 15.9) | 2008-2012 | -7.1 (-8.6, -5.6)    | 2012-2018 | 2.6 (1.9, 3.3)       | –         | –                    | 6.5 (6.0, 7.0)           |
| 75                                 | 1998-2008 | 9.5 (9.2, 9.9)    | 2008-2014 | -6.8 (-7.2, -6.5)    | 2014-2018 | 0.7 (-0.2, 1.7)      | –         | –                    | 2.6 (2.4, 2.9)           |
| 85                                 | 1998-2008 | 12.3 (12.1, 12.6) | 2008-2011 | -1.6 (-2.4, -0.8)    | 2011-2015 | 4.3 (3.9, 4.7)       | 2015-2018 | -3.0 (-3.4, -2.5)    | 6.1 (6.0, 6.3)           |
| <b>Gender</b>                      |           |                   |           |                      |           |                      |           |                      |                          |
| Men                                | 1998-2005 | 12.1 (11.5, 12.6) | 2005-2008 | 7.9 (6.7, 9.1)       | 2008-2013 | -9.7 (-10.0, -9.3)   | 2013-2018 | -0.1 (-0.6, 0.4)     | 2.6 (2.3, 2.8)           |
| Women                              | 1998-2008 | 15.1 (14.8, 15.4) | 2008-2012 | -2.0 (-2.5, -1.5)    | 2012-2015 | 1.3 (0.3, 2.3)       | 2015-2018 | -8.5 (-9.3, -7.8)    | 5.6 (5.4, 5.9)           |
| <b>Ethnicity</b>                   |           |                   |           |                      |           |                      |           |                      |                          |
| White                              | 1998-2008 | 21.5 (19.8, 23.3) | 2008-2012 | -8.2 (-10.3, -6.1)   | 2012-2018 | 1.3 (0.2, 2.3)       | –         | –                    | 8.8 (7.9, 9.7)           |
| Others                             | 1998-2010 | -3.2 (-3.3, -3.2) | 2010-2014 | -8.8 (-9.1, -8.5)    | 2014-2018 | 6.4 (6.1, 6.6)       | –         | –                    | -2.6 (-2.6, -2.5)        |
| <b>Deprivation</b>                 |           |                   |           |                      |           |                      |           |                      |                          |
| Least deprived                     | 1998-2006 | 27.2 (25.7, 28.7) | 2006-2009 | 11.4 (9.5, 13.4)     | 2009-2014 | -16.0 (-16.6, -15.4) | 2014-2018 | 11.4 (10.1, 12.6)    | 9.5 (8.9, 10.0)          |
| Most deprived                      | 1998-2008 | 1.7 (1.5, 1.9)    | 2008-2012 | 8.0 (7.5, 8.6)       | 2012-2015 | -7.2 (-8.1, -6.3)    | 2015-2018 | 17.2 (16.6, 17.9)    | 3.7 (3.5, 3.9)           |
| <b>BMI group, kg/m<sup>2</sup></b> |           |                   |           |                      |           |                      |           |                      |                          |
| 18.5-24.9                          | 1998-2006 | 0.4 (0.1, 0.6)    | 2006-2010 | 18.4 (17.6, 19.2)    | 2010-2014 | -15.0 (-15.6, -14.4) | 2014-2018 | -5.7 (-6.6, -4.8)    | -0.9 (-1.1, -0.6)        |
| 25.0-29.9                          | 1998-2008 | 23.5 (22.4, 24.5) | 2008-2013 | -10.5 (-11.2, -9.7)  | 2013-2018 | 3.2 (2.3, 4.2)       | –         | –                    | 9.0 (8.4, 9.5)           |
| 30.0-34.9                          | 1998-2009 | 6.7 (6.1, 7.4)    | 2009-2012 | -11.2 (-14.5, -7.9)  | 2012-2018 | 6.3 (5.4, 7.1)       | –         | –                    | 3.7 (3.1, 4.3)           |
| ≥35.0                              | 1998-2010 | 0.8 (0.3, 1.3)    | 2010-2013 | 31.0 (27.0, 35.1)    | 2013-2018 | -15.9 (-16.6, -15.1) | –         | –                    | 0.2 (-0.3, 0.8)          |
| <b>Smoking status</b>              |           |                   |           |                      |           |                      |           |                      |                          |
| Current smoker                     | 1998-2008 | 36.1 (33.5, 38.8) | 2008-2014 | -8.9 (-9.6, -8.2)    | 2014-2018 | 2.9 (1.2, 4.7)       | –         | –                    | 14.1 (13.0, 15.2)        |
| Ex-smoker                          | 1998-2008 | 6.5 (6.2, 6.7)    | 2008-2012 | -7.6 (-8.2, -7.0)    | 2012-2015 | 10.0 (8.7, 11.3)     | 2015-2018 | -9.6 (-10.4, -8.8)   | 1.5 (1.2, 1.7)           |
| Non-smoker                         | 1998-2008 | 11.6 (11.3, 11.9) | 2008-2012 | -10.3 (-10.9, -9.6)  | 2012-2015 | 7.7 (5.9, 9.4)       | 2015-2018 | -2.9 (-3.9, -1.9)    | 4.1 (3.7, 4.4)           |
| <b>Liver</b>                       |           |                   |           |                      |           |                      |           |                      |                          |
| <b>Age, years old</b>              |           |                   |           |                      |           |                      |           |                      |                          |
| 55                                 | 1998-2009 | 6.9 (6.6, 7.2)    | 2009-2013 | 17.5 (16.9, 18.1)    | 2013-2016 | -12.5 (-13.3, -11.8) | 2016-2018 | -2.2 (-3.8, -0.6)    | 4.8 (4.5, 5.0)           |
| 65                                 | 1998-2015 | 5.8 (5.5, 6.1)    | 2015-2018 | -18.6 (-21.8, -15.2) | –         | –                    | –         | –                    | 1.7 (1.1, 2.4)           |
| 75                                 | 1998-2009 | 12.3 (11.4, 13.2) | 2009-2013 | -15.1 (-16.9, -13.2) | 2013-2016 | 24.7 (18.7, 30.9)    | 2016-2018 | -20.6 (-26.1, -14.7) | 4.2 (3.1, 5.3)           |
| 85                                 | 1998-2009 | 5.8 (5.5, 6.1)    | 2009-2014 | -1.5 (-2.0, -0.9)    | 2014-2018 | 5.6 (5.1, 6.2)       | –         | –                    | 3.9 (3.7, 4.1)           |
| <b>Gender</b>                      |           |                   |           |                      |           |                      |           |                      |                          |
| Men                                | 1998-2009 | 4.4 (4.2, 4.7)    | 2009-2013 | -15.2 (-16.1, -14.3) | 2013-2016 | 17.3 (14.6, 20.1)    | 2016-2018 | -14.7 (-17.3, -11.9) | -0.1 (-0.6, 0.4)         |
| Women                              | 1998-2010 | 32.8 (31.9, 33.8) | 2010-2013 | -19.1 (-20.1, -18.1) | 2013-2016 | 34.9 (32.8, 37.0)    | 2016-2018 | -34.5 (-36.6, -32.4) | 15.2 (14.5, 15.8)        |
| <b>Ethnicity</b>                   |           |                   |           |                      |           |                      |           |                      |                          |
| White                              | 1998-2010 | 9.0 (8.6, 9.4)    | 2010-2013 | -12.4 (-14.3, -10.4) | 2013-2016 | 20.5 (17.8, 23.2)    | 2016-2018 | -29.7 (-33.1, -26.1) | 2.5 (1.8, 3.2)           |
| Others                             | 1998-2010 | 24.1 (23.1, 25.0) | 2010-2013 | -55.2 (-60.4, -49.3) | 2013-2016 | 121.3 (-12.2, 457.3) | 2016-2018 | -41.8 (-57.3, -20.7) | 7.7 (-5.1, 22.1)         |
| <b>Deprivation</b>                 |           |                   |           |                      |           |                      |           |                      |                          |
| Least deprived                     | 1998-2010 | 11.5 (11.4, 11.5) | 2010-2013 | 4.3 (4.1, 4.5)       | 2013-2016 | 27.7 (27.6, 27.9)    | 2016-2018 | -50.5 (-50.9, -50.1) | 3.9 (3.8, 3.9)           |
| Most deprived                      | 1998-2007 | 29.9 (29.1, 30.7) | 2007-2010 | 14.4 (13.7, 15.1)    | 2010-2014 | -32.0 (-32.5, -31.4) | 2014-2018 | 24.2 (23.3, 25.0)    | 11.0 (10.6, 11.3)        |
| <b>BMI group, kg/m<sup>2</sup></b> |           |                   |           |                      |           |                      |           |                      |                          |
| 18.5-24.9                          | 1998-2015 | 18.9 (14.6, 23.3) | 2015-2018 | -37.8 (-62.1, 2.0)   | –         | –                    | –         | –                    | 7.9 (0.1, 16.2)          |
| 25.0-29.9                          | 1998-2009 | 6.5 (6.3, 6.7)    | 2009-2012 | -17.9 (-19.0, -16.8) | 2012-2015 | 23.9 (21.7, 26.2)    | 2015-2018 | -22.9 (-24.2, -21.5) | -0.2 (-0.6, 0.2)         |
| 30.0-34.9                          | 1998-2018 | 5.5 (2.6, 8.4)    | –         | –                    | –         | –                    | –         | –                    | 5.5 (2.6, 8.4)           |
| ≥35.0                              | 1998-2008 | 12.3 (10.9, 13.6) | 2008-2011 | 7.1 (4.1, 10.2)      | 2011-2014 | -18.3 (-21.2, -15.3) | 2014-2018 | -3.5 (-5.7, -1.3)    | 3.1 (2.2, 4.1)           |
| <b>Smoking status</b>              |           |                   |           |                      |           |                      |           |                      |                          |
| Current smoker                     | 1998-2009 | -4.3 (-4.7, -3.9) | 2009-2013 | 15.4 (13.4, 17.5)    | 2013-2016 | -15.5 (-18.6, -12.4) | 2016-2018 | 50.8 (46.6, 55.1)    | 2.0 (1.4, 2.7)           |
| Ex-smoker                          | 1998-2012 | -5.2 (-5.3, -5.0) | 2012-2016 | 12.3 (11.2, 13.5)    | 2016-2018 | -31.1 (-34.2, -27.9) | –         | –                    | -5.0 (-5.4, -4.5)        |
| Non-smoker                         | 1998-2010 | 21.3 (19.9, 22.6) | 2010-2013 | -27.2 (-30.2, -24.1) | 2013-2016 | 28.7 (21.9, 35.9)    | 2016-2018 | -42.3 (-51.7, -31.1) | 5.2 (3.3, 7.2)           |
| <b>Gallbladder</b>                 |           |                   |           |                      |           |                      |           |                      |                          |

|                       | Period 1  | APC, %               | Period 2  | APC, %               | Period 3  | APC, %               | Period 4  | APC, %               | AAPC for whole period, % |
|-----------------------|-----------|----------------------|-----------|----------------------|-----------|----------------------|-----------|----------------------|--------------------------|
| <b>Age, years old</b> |           |                      |           |                      |           |                      |           |                      |                          |
| 65                    | 1998-2013 | -14.6 (-14.7, -14.6) | 2013-2016 | 113.1 (112.1, 114.1) | 2016-2018 | -84.4 (-85.2, -83.6) | –         | –                    | -17.4 (-17.8, -17.0)     |
| 75                    | 1998-2010 | -24.8 (-25.5, -24.0) | 2010-2014 | 40.1 (15.4, 70.2)    | 2014-2018 | -1.5 (-8.7, 6.2)     | –         | –                    | -10.1 (-13.5, -6.6)      |
| 85                    | 1998-2012 | -0.9 (-1.1, -0.8)    | 2012-2015 | 40.3 (38.6, 42.1)    | 2015-2018 | -27.7 (-37.4, -16.4) | –         | –                    | -0.4 (-2.4, 1.6)         |
| <b>Endometrium</b>    |           |                      |           |                      |           |                      |           |                      |                          |
| <b>Age, years old</b> |           |                      |           |                      |           |                      |           |                      |                          |
| 55                    | 1998-2009 | -5.7 (-6.2, -5.1)    | 2009-2013 | 21.1 (17.9, 24.4)    | 2013-2018 | -23.9 (-26.0, -21.7) | –         | –                    | -6.0 (-6.8, -5.2)        |
| 65                    | 1998-2007 | 14.1 (13.6, 14.6)    | 2007-2010 | 8.7 (7.6, 9.8)       | 2010-2014 | -3.5 (-3.9, -3.0)    | 2014-2018 | 5.8 (5.5, 6.2)       | 7.9 (7.7, 8.2)           |
| 75                    | 1998-2009 | 9.8 (9.2, 10.4)      | 2009-2013 | -24.8 (-26.8, -22.8) | 2013-2018 | 22.4 (20.6, 24.1)    | –         | –                    | 4.6 (3.9, 5.3)           |
| 85                    | 1998-2009 | 23.4 (22.9, 24.0)    | 2009-2013 | 1.0 (0.5, 1.4)       | 2013-2016 | 22.7 (22.1, 23.4)    | 2016-2018 | -11.6 (-12.2, -11.0) | 14.6 (14.3, 14.9)        |

Due to small numbers of events, stratified analyses were not possible for gallbladder and endometrial cancer mortality while rate for gallbladder cancer mortality in 55-year-old subjects was not estimable.

**APC:** Annual Percentage Change; **AAPC:** Average Annual Percentage Change. –: Not applicable. Different number of segments for each stratum (period 1 to 4) are identified by Joinpoint regressions.

**ESM Figure 1.** Study participants selection flowchart

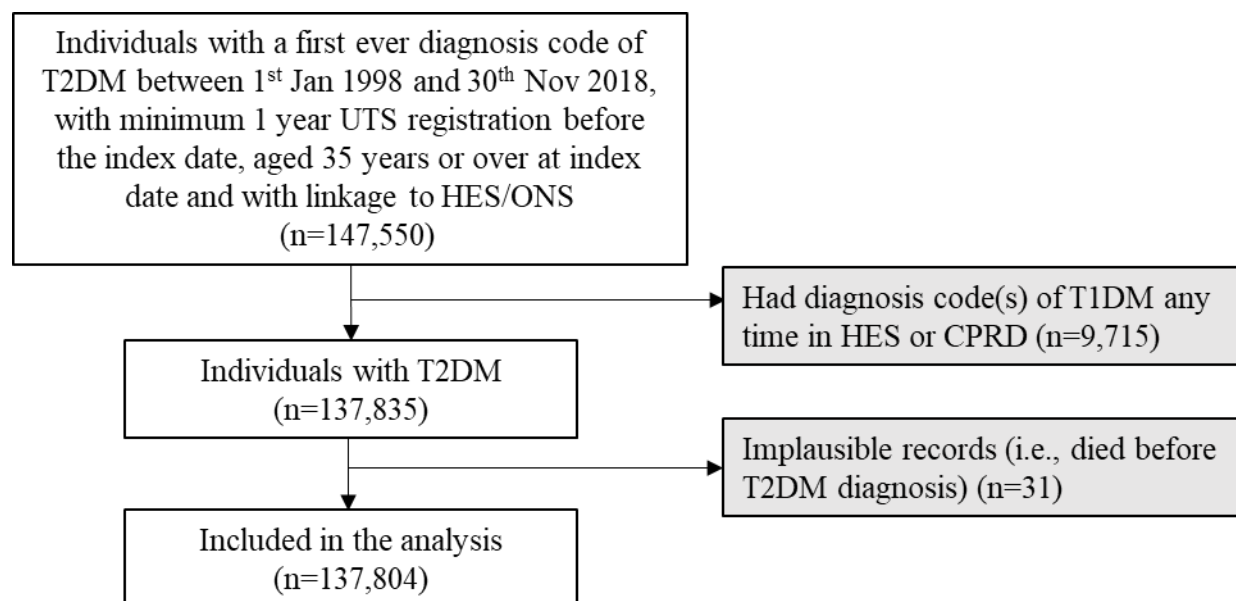

T2DM: type 2 diabetes; T1DM: type 1 diabetes; UTS: up-to-standard date; HES: Hospital Episodes Statistics; ONS: Office for National Statistics.

The index date was the first diagnosis date of type 2 diabetes.

## RECORD checklist

|                           | Item No. | STROBE items                                                                                                                                                                                                                                                  | Location in manuscript where items are reported | RECORD items                                                                                                                                                                                                                                                                                                                                                                                                                                                                                                                                                                                                                                                                          | Location in manuscript where items are reported |
|---------------------------|----------|---------------------------------------------------------------------------------------------------------------------------------------------------------------------------------------------------------------------------------------------------------------|-------------------------------------------------|---------------------------------------------------------------------------------------------------------------------------------------------------------------------------------------------------------------------------------------------------------------------------------------------------------------------------------------------------------------------------------------------------------------------------------------------------------------------------------------------------------------------------------------------------------------------------------------------------------------------------------------------------------------------------------------|-------------------------------------------------|
| <b>Title and abstract</b> |          |                                                                                                                                                                                                                                                               |                                                 |                                                                                                                                                                                                                                                                                                                                                                                                                                                                                                                                                                                                                                                                                       |                                                 |
|                           | 1        | (a) Indicate the study's design with a commonly used term in the title or the abstract (b) Provide in the abstract an informative and balanced summary of what was done and what was found                                                                    |                                                 | RECORD 1.1: The type of data used should be specified in the title or abstract. When possible, the name of the databases used should be included.<br>RECORD 1.2: If applicable, the geographic region and timeframe within which the study took place should be reported in the title or abstract.<br>RECORD 1.3: If linkage between databases was conducted for the study, this should be clearly stated in the title or abstract.                                                                                                                                                                                                                                                   | 1, 3                                            |
| <b>Introduction</b>       |          |                                                                                                                                                                                                                                                               |                                                 |                                                                                                                                                                                                                                                                                                                                                                                                                                                                                                                                                                                                                                                                                       |                                                 |
| Background rationale      | 2        | Explain the scientific background and rationale for the investigation being reported                                                                                                                                                                          |                                                 |                                                                                                                                                                                                                                                                                                                                                                                                                                                                                                                                                                                                                                                                                       | 5                                               |
| Objectives                | 3        | State specific objectives, including any prespecified hypotheses                                                                                                                                                                                              |                                                 |                                                                                                                                                                                                                                                                                                                                                                                                                                                                                                                                                                                                                                                                                       | 5                                               |
| <b>Methods</b>            |          |                                                                                                                                                                                                                                                               |                                                 |                                                                                                                                                                                                                                                                                                                                                                                                                                                                                                                                                                                                                                                                                       |                                                 |
| Study Design              | 4        | Present key elements of study design early in the paper                                                                                                                                                                                                       |                                                 |                                                                                                                                                                                                                                                                                                                                                                                                                                                                                                                                                                                                                                                                                       | 6, 7                                            |
| Setting                   | 5        | Describe the setting, locations, and relevant dates, including periods of recruitment, exposure, follow-up, and data collection                                                                                                                               |                                                 |                                                                                                                                                                                                                                                                                                                                                                                                                                                                                                                                                                                                                                                                                       | 6, 7                                            |
| Participants              | 6        | (a) <i>Cohort study</i> - Give the eligibility criteria, and the sources and methods of selection of participants. Describe methods of follow-up<br>(b) <i>Cohort study</i> - For matched studies, give matching criteria and number of exposed and unexposed |                                                 | RECORD 6.1: The methods of study population selection (such as codes or algorithms used to identify subjects) should be listed in detail. If this is not possible, an explanation should be provided.<br>RECORD 6.2: Any validation studies of the codes or algorithms used to select the population should be referenced. If validation was conducted for this study and not published elsewhere, detailed methods and results should be provided.<br>RECORD 6.3: If the study involved linkage of databases, consider use of a flow diagram or other graphical display to demonstrate the data linkage process, including the number of individuals with linked data at each stage. | 6,7, ESM fig. 1                                 |
| Variables                 | 7        | Clearly define all outcomes, exposures, predictors, potential confounders, and effect modifiers. Give diagnostic criteria, if applicable.                                                                                                                     |                                                 | RECORD 7.1: A complete list of codes and algorithms used to classify exposures, outcomes, confounders, and effect modifiers should be provided. If these cannot be reported, an explanation should be provided.                                                                                                                                                                                                                                                                                                                                                                                                                                                                       | 6,7, Github ID: supingling                      |
| Data sources/ measurement | 8        | For each variable of interest, give sources of data and details of methods of assessment (measurement). Describe comparability of assessment methods if there is more than one group                                                                          |                                                 |                                                                                                                                                                                                                                                                                                                                                                                                                                                                                                                                                                                                                                                                                       | 6, 7                                            |
| Bias                      | 9        | Describe any efforts to address potential sources of bias                                                                                                                                                                                                     |                                                 |                                                                                                                                                                                                                                                                                                                                                                                                                                                                                                                                                                                                                                                                                       | NA                                              |
| Study size                | 10       | Explain how the study size was arrived at                                                                                                                                                                                                                     |                                                 |                                                                                                                                                                                                                                                                                                                                                                                                                                                                                                                                                                                                                                                                                       | 7, ESM fig. 1                                   |

|                                  |    |                                                                                                                                                                                                                                                                                                                                                 |  |                                                                                                                                                                                                                                                                                                                    |                                                   |
|----------------------------------|----|-------------------------------------------------------------------------------------------------------------------------------------------------------------------------------------------------------------------------------------------------------------------------------------------------------------------------------------------------|--|--------------------------------------------------------------------------------------------------------------------------------------------------------------------------------------------------------------------------------------------------------------------------------------------------------------------|---------------------------------------------------|
| Quantitative variables           | 11 | Explain how quantitative variables were handled in the analyses. If applicable, describe which groupings were chosen, and why                                                                                                                                                                                                                   |  |                                                                                                                                                                                                                                                                                                                    | 6                                                 |
| Statistical methods              | 12 | (a) Describe all statistical methods, including those used to control for confounding<br>(b) Describe any methods used to examine subgroups and interactions<br>(c) Explain how missing data were addressed<br>(d) <i>Cohort study</i> - If applicable, explain how loss to follow-up was addressed<br>(e) Describe any sensitivity analyses    |  |                                                                                                                                                                                                                                                                                                                    | 7                                                 |
| Data access and cleaning methods |    | ..                                                                                                                                                                                                                                                                                                                                              |  | RECORD 12.1: Authors should describe the extent to which the investigators had access to the database population used to create the study population.<br>RECORD 12.2: Authors should provide information on the data cleaning methods used in the study.                                                           | 6, 16                                             |
| Linkage                          |    | ..                                                                                                                                                                                                                                                                                                                                              |  | RECORD 12.3: State whether the study included person-level, institutional-level, or other data linkage across two or more databases. The methods of linkage and methods of linkage quality evaluation should be provided.                                                                                          | 6, 7                                              |
| <b>Results</b>                   |    |                                                                                                                                                                                                                                                                                                                                                 |  |                                                                                                                                                                                                                                                                                                                    |                                                   |
| Participants                     | 13 | (a) Report the numbers of individuals at each stage of the study ( <i>e.g.</i> , numbers potentially eligible, examined for eligibility, confirmed eligible, included in the study, completing follow-up, and analysed)<br>(b) Give reasons for non-participation at each stage.<br>(c) Consider use of a flow diagram                          |  | RECORD 13.1: Describe in detail the selection of the persons included in the study ( <i>i.e.</i> , study population selection) including filtering based on data quality, data availability and linkage. The selection of included persons can be described in the text and/or by means of the study flow diagram. | 8, ESM fig. 1                                     |
| Descriptive data                 | 14 | (a) Give characteristics of study participants ( <i>e.g.</i> , demographic, clinical, social) and information on exposures and potential confounders<br>(b) Indicate the number of participants with missing data for each variable of interest<br>(c) <i>Cohort study</i> - summarise follow-up time ( <i>e.g.</i> , average and total amount) |  |                                                                                                                                                                                                                                                                                                                    | 8, Table 1                                        |
| Outcome data                     | 15 | <i>Cohort study</i> - Report numbers of outcome events or summary measures over time                                                                                                                                                                                                                                                            |  |                                                                                                                                                                                                                                                                                                                    | 8, Table 2                                        |
| Main results                     | 16 | (a) Give unadjusted estimates and, if applicable, confounder-adjusted estimates and their precision ( <i>e.g.</i> , 95% confidence interval). Make clear which confounders were adjusted for and why they were included<br>(b) Report category boundaries when continuous variables were categorized                                            |  |                                                                                                                                                                                                                                                                                                                    | 8-11, Table 3, Table 4, Figure 1-4, ESM Table 1-8 |

|                                                           |    |                                                                                                                                                                            |  |                                                                                                                                                                                                                                                                                                          |                                                   |
|-----------------------------------------------------------|----|----------------------------------------------------------------------------------------------------------------------------------------------------------------------------|--|----------------------------------------------------------------------------------------------------------------------------------------------------------------------------------------------------------------------------------------------------------------------------------------------------------|---------------------------------------------------|
|                                                           |    | (c) If relevant, consider translating estimates of relative risk into absolute risk for a meaningful time period                                                           |  |                                                                                                                                                                                                                                                                                                          |                                                   |
| Other analyses                                            | 17 | Report other analyses done—e.g., analyses of subgroups and interactions, and sensitivity analyses                                                                          |  |                                                                                                                                                                                                                                                                                                          | 8-11, Table 3, Table 4, Figure 1-4, ESM Table 1-8 |
| <b>Discussion</b>                                         |    |                                                                                                                                                                            |  |                                                                                                                                                                                                                                                                                                          |                                                   |
| Key results                                               | 18 | Summarise key results with reference to study objectives                                                                                                                   |  |                                                                                                                                                                                                                                                                                                          | 12                                                |
| Limitations                                               | 19 | Discuss limitations of the study, taking into account sources of potential bias or imprecision. Discuss both direction and magnitude of any potential bias                 |  | RECORD 19.1: Discuss the implications of using data that were not created or collected to answer the specific research question(s). Include discussion of misclassification bias, unmeasured confounding, missing data, and changing eligibility over time, as they pertain to the study being reported. | 12, 13                                            |
| Interpretation                                            | 20 | Give a cautious overall interpretation of results considering objectives, limitations, multiplicity of analyses, results from similar studies, and other relevant evidence |  |                                                                                                                                                                                                                                                                                                          | 12-15                                             |
| Generalisability                                          | 21 | Discuss the generalisability (external validity) of the study results                                                                                                      |  |                                                                                                                                                                                                                                                                                                          | 12-15,                                            |
| <b>Other Information</b>                                  |    |                                                                                                                                                                            |  |                                                                                                                                                                                                                                                                                                          |                                                   |
| Funding                                                   | 22 | Give the source of funding and the role of the funders for the present study and, if applicable, for the original study on which the present article is based              |  |                                                                                                                                                                                                                                                                                                          | 16                                                |
| Accessibility of protocol, raw data, and programming code |    | ..                                                                                                                                                                         |  | RECORD 22.1: Authors should provide information on how to access any supplemental information such as the study protocol, raw data, or programming code.                                                                                                                                                 | 16                                                |

Benchimol EI, Smeeth L, Guttman A, Harron K, Moher D, Petersen I, Sørensen HT, von Elm E, Langan SM, the RECORD Working Committee. The REporting of studies Conducted using Observational Routinely-collected health Data (RECORD) Statement. *PLoS Medicine* 2015.

Checklist is protected under Creative Commons Attribution ([CC BY](https://creativecommons.org/licenses/by/4.0/)) license.

Page numbers refer to the original, word document submission.
